# Supplementary material for: Biodiversity assessment among two Nebraska prairies: a comparison between traditional and phylogenetic diversity indices
Source: Biodivers Data J. 2015 Jul 17;(3):e5403. doi: 10.3897/BDJ.3.e5403 (PMC4549632; doi:10.3897/BDJ.3.e5403)
Supplement: Supplementary material 6 — cpmtnuc Nexus file [file biodiversity_data_journal-3-e5403-s006.nex]

#NEXUS
begin taxa;
	dimensions ntax=65;
	taxlabels
	Achillea_millefolium
	Androsace_occidentalis
	Antennaria_howellii_subsp_neodica
	Antennaria_neglecta
	Asclepias_syriaca
	Asclepias_verticillata
	Campanula_rotundifolia
	Carduus_nutans
	Cicuta_maculata
	Cirsium_canescens
	Cirsium_undulatum
	Comandra_umbellata
	Conium_maculatum
	Convolvulus_arvensis
	Echinacea_angustifolia
	Ellisia_nyctelea
	Erigeron_bellidiastrum
	Erigeron_philadelphicus
	Erigeron_strigosus
	Evolvulus_nuttallianus
	Galium_aparine
	Grindelia_squarrosa_var_squarrosa
	Gutierrezia_sarothrae
	Helianthus_annuus
	Helianthus_pauciflorus_subsp_subrhomboideus
	Helianthus_petiolaris
	Helianthus_tuberosus
	Heliopsis_helianthoides_var_occidentalis
	Heterotheca__stenophylla_var_stenophylla
	Heterotheca__villosa
	Hymenopappus_tenuifolius
	Imaptiens_capensis
	Ipomoea_leptophylla
	Lactuca_ludoviciana
	Liatris_glabrata
	Lygodesmia_juncea
	Monarda_fistulosa_var_mollis
	Nepeta_cataria
	Penstemon_angustifolius
	Penstemon_gracilis
	Physalis_heterophylla
	Physalis_virginiana
	Plantago_patagonica
	Ratibida_columnifera
	Rudbeckia_hirta_var_pulcherrima
	Salvia_nemorosa
	Senecio_integerrimus
	Silene_antirrhina
	Silene_vulgaris
	Silphium_integrifolum
	Solanum_carolinense
	Solanum_rostratum
	Solanum_triflorum
	Solidago_gigantea
	Solidago_missouriensis
	Symphoricarpus_occidentalis
	Teucrium_canadense
	Thelesperma_filifolium
	Tragopogon_dubius
	Verbascum_thapsus
	Verbena_hastata
	Vernonia_baldwinii
	Veronica_americana
	Xanthisma_spinulosum
	Zizia_aurea
;
end;
begin characters;
	dimensions nchar=66079;
	format datatype=dna missing=? gap=-;
	matrix
	Achillea_millefolium	ATGGTAACCATTCAAGCCGACGAAATTAGTAATATTATCCGCGAACGTATTGAGCAATATAATAGAGAAGTAAAGATTGTAAATACCGGTACCGTACTTCAAGTAGGTGATGGCATTGCTCGTATTCATGGTCTTGATGAAGTAATGGCGGGTGAATTAGTAGAATTTCAAGAGGGTACAATAGGCATTGCTCTTAATTTGGAATCAACTAATGTTGGTGTTGTATTAATGGGTGATGGTTTACTGATACAAGAGGGGAGTTCTGTAAAAGCAACAGGAAAAATTGCTCAGATACCTGTGAGTGAGGCCTATTTGGGTCGTGTTGTAAACGCCCTGGCTAAACCTATTGATGGTAGAGGTGAAATTGCATTTTCTGAATATAGGTTAATTGAATCGCCC…
	Androsace_occidentalis	ATGGCAACTATTCGAGCCGACGAAATTAGTAATATTATCCGTGAACGCATTGAGCAATATAACAGAGAAGTAAAGATTGTAAATACCGGTACTGTACTTCAAGTAGGTGATGGCATTGCTCGTATTCATGGTCTTGATGAAGTAATGGCAGGTGAGTTAGTAGAATTTGAAGAGAATACGATAGGCATTGCTCTAAATTTGGAATCAAATAATGTTGGTGTTGTATTAATGGGTGATGGTTTGCTGATACAAGAAGGAAGTTCTGTCAAAGCAACAGGAAAAATTGCTCAGATACCCGTGAGTGAAGCTTATTTAGGTCGTGTTATAAATGCCTTGGCGAAACCTATTGATGGTAGAGGTGAAATTTCCGCTTCTGAATCTCGCTTAATTGAATCTCCC…
	Antennaria_howellii_subsp_neodica	ATGGTAACCATTCAAGCCGACGAAATTAGTAATATTATCCGTGAACGTATTGAGCAATATAATAGAGAAGTAAAGATTGTAAATACCGGTACCGTACTTCAAGTAGGTGATGGCATTGCTCGTATTCATGGTCTTGATGAAGTAATGGCGGGTGAATTAGTAGAATTTGAAGAGGGGACAATAGGCATTGCTCTTAATTTGGAATCAACTAATGTTGGTGTTGTATTAATGAGTGATGGTTTGCTGATACAAGAAGGGAGTTCTGTAAAAGCAACAGGAAAAATTGCTCAGATACCAGTGAGCGAGGCCTATTTGGGTCGTGTTGTAAACGCCCTGGCTAAACCTATTGATGGTAGAGGTGAAATTTCATCTTCTGAATATAGGTTAATTGAATCGCCC…
	Antennaria_neglecta	ATGGTAACCATTCAAGCCGACGAAATTAGTAATATTATCCGTGAACGTATTGAGCAATATAATAGAGAAGTAAAGATTGTAAATACCGGTACCGTACTTCAAGTAGGTGATGGCATTGCTCGTATTCATGGTCTTGATGAAGTAATGGCGGGTGAATTAGTAGAATTTGAAGAGGGGACAATAGGCATTGCTCTTAATTTGGAATCAACTAATGTTGGTGTTGTATTAATGAGTGATGGTTTGCTGATACAAGAAGGGAGTTCTGTAAAAGCAACAGGAAAAATTGCTCAGATACCAGTGAGCGAGGCCTATTTGGGTCGTGTTGTAAACGCCCTGGCTAAACCTATTGATGGTAGAGGTGAAATTTCATCTTCTGAATATAGGTTAATTGAATCGCCC…
	Asclepias_syriaca	ATGGTAACCATTCGAGCTGACGAAATTAGTAATATTATTCGTGAACGGATTGAACAATATAATAGAGAAGTAAAGATTGTAAATACTGGTAGCGTACTTCAAGTAGGCGATGGCATTGCTCGTATTCATGGTCTTGATGAAGTAATGGCGGGAGAATTGGTCGAATTTGAAGAGGGAACGGTAGGTATTGCTTTGAATTTAGAATCAAATAATGTTGGTGTTGTATTAATGGGTGATGGTTTGATGATACAAGAAGGAAGTTCGGTAAAAGCAACAGGAAAAATTGCTCAGATTCCAGTGAGTGACGCCTACTTAGGGCGTGTTATAAACGCCCTAGCTAAACCTATTGATGGTAGGGGCGAAATTTCAGCTTCTGAATCTCGATTAATTGAATCTCCT…
	Asclepias_verticillata	ATGGTAACCATTCGAGCTGACGAAATTAGTAATATTATTCGTGAACGGATTGAACAATATAATAGAGAAGTAAAGATTGTAAATACTGGTAGCGTACTTCAAGTAGGCGATGGCATTGCTCGTATTCATGGTCTTGATGAAGTAATGGCGGGAGAATTGGTCGAATTTGAAGAGGGAACGGTAGGTATTGCTTTGAATTTAGAATCAAATAATGTTGGTGTTGTATTAATGGGTGATGGTTTGATGATACAAGAAGGAAGTTCGGTAAAAGCAACAGGAAAAATTGCTCAGATTCCAGTGAGTGACGCCTACTTAGGGCGTGTTATAAACGCCCTAGCTAAACCTATTGATGGTAGGGGCGAAATTTCAGCTTCTGAATCTCGCTTAATTGAATCTCCT…
	Campanula_rotundifolia	ATGGTAAACGTTCGAGCCGACGAAATTAGTACTATTATTCGCGAACGTATTAAGCAATATAATAGAGAAGTAAAGATTGAAAATACCGGTAGCGTACTTCAAGTAGGCGACGGCATTGCTCGTATTCATGGTCTTGACGAAATAATGGCGGGCGAATTAGTCGAATTTGAAGAGGGTACAATAGGCATTGCTCTGAATTTGGAATCACATAATGTTGGTGTTGTATTAATGGGGGATGGTTTGCGGATCCAAGAAGGGAGTTCTGTAAAAGCAACAGGAAGAATTGCTCAAATACCGGTGAGTGAGGCCTATTTGGGCCGTGTTATAAACGCTCTCGCTAAACCTATTGATGGTAGAGGTGAAATTTCATCTTCTGAATCTCGCTTAATTGAATCTCCC…
	Carduus_nutans	ATGGTAACCATTCAAGCCGACGAAATTAGTAATATTATCCGTGAACGTATTGAGCAATATAATAGAGAAGTAAAGATTGTAAATACCGGTACCGTACTTCAAGTAGGTGATGGCATTGCTCGTATTCATGGTCTTGATGAAGTAATGGCGGGTGAATTAGTAGAATTTGAAGAGGGTACAATAGGCATTGCTCTTAATTTGGAATCAACTAATGTTGGTGTTGTATTAATGGGTGATGGTTTGCTGATACAAGAAGGGAGTTCTGTAAAAGCAACAGGAAGAATTGCTCAGATACCAGTGAGTGAGGCCTATTTGGGTCGTGTTATAAACGCCCTGGCTAAACCTATTGATGGTAGAGGTGAAATTTCATCTTCTGAATATAGGTTAATTGAATCGGCG…
	Cicuta_maculata	ATGGTAACCATTCGAGCCGACGAAATTAGTAAGATAATCCGTGAGCGTATTGAGGAATATAATAGAGAAGTAAAAATTGTAAATACCGGTACCGTACTGCAAGTAGGTGACGGCATTGCTCGTATTCATGGTCTTGATGAAGTAATGGCGGGTGAATTAGTAGAATTTCAAGAGGGTACAGTAGGCATTGCTCTGAATTTGGAATCAACAAATGTCGGTGTTGTATTAATGGGCGATGGTTTGCTGATACAAGAAGGAAGTTCTGTAAAAGCAACAGGAAGAATTGCTCAGATACCCGTGAGTGAGGCCTATTTGGGTCGTGTTGTAAATGCCCTGGCTAAACCTATTGATGGTAGGGGTGAAATTTCAGCTTCTGAATATCGGTTAATTGAATCTCCT…
	Cirsium_canescens	ATGGTAACCATTCAAGCCGACGAAATTAGTAATATTATCCGTGAACGTATTGAGCAATATAATAGAGAAGTAAAGATTGTAAATACCGGTACCGTACTTCAAGTAGGTGATGGCATTGCTCGTATTCATGGTCTTGATGAAGTAATGGCGGGTGAATTAGTAGAATTTGAAGAGGGTACAATAGGCATTGCTCTTAATTTGGAATCAACTAATGTTGGTGTTGTATTAATGGGTGATGGTTTGCTGATACAAGAAGGGAGTTCTGTAAAAGCAACAGGAAGAATTGCTCAGATACCAGTGAGTGAGGCCTATTTGGGTCGTGTTATAAACGCCCTGGCTAAACCTATTGATGGTAGAGGTGAAATTTCATCTTCTGAATATAGGTTAATTGAATCGGCG…
	Cirsium_undulatum	ATGGTAACCATTCAAGCCGACGAAATTAGTAATATTATCCGTGAACGTATTGAGCAATATAATAGAGAAGTAAAGATTGTAAATACCGGTACCGTACTTCAAGTAGGTGATGGCATTGCTCGTATTCATGGTCTTGATGAAGTAATGGCGGGTGAATTAGTAGAATTTGAAGAGGGTACAATAGGCATTGCTCTTAATTTGGAATCAACTAATGTTGGTGTTGTATTAATGGGTGATGGTTTGCTGATACAAGAAGGGAGTTCTGTAAAAGCAACAGGAAGAATTGCTCAGATACCAGTGAGTGAGGCCTATTTGGGTCGTGTTATAAACGCCCTGGCTAAACCTATTGATGGTAGAGGTGAAATTTCATCTTCTGAATATAGGTTAATTGAATCGGCG…
	Comandra_umbellata	ATGGTAACCATTCGAGCTGACGAAATTAGTAAGATTATCCGGGAACGTATTGAGCAATATAATAGAGAAGTAAAGATTGTAAATACGGGTACCGTACTTCAAGTGGGCGATGGCATTGCTCGTATTTACGGTCTTGATGAAGTGATGGCTGGTGAATTAGTAGAATTTGAAGAGGGTACAATAGGTATTGCTCTGAATTTGGAATCCAATAATGTTGGTGTTGTATTAATGGGTGATGGTTTAATGATACAAGAGGGAAGTTCTGTAAAAGCAACAGGACGAATTGCTCAAATACCAGTGAGTGAGGCTTATTTAGGTCGTGTTATAAATGCCCTAGCTAAACCTATTGATGGTAGAGGTGAAATTCCAGCTTCTGAATATCGGTTAATTGAATCTCCC…
	Conium_maculatum	ATGGTAACAATTCGAGCCGACGAAATTAGTAAGATTATCCGTGAGCGAATAGAAGAATATAATAGAGAAGTAAAGATTGTAAATACCGGTACCGTACTGCAAGTAGGTGACGGCATTGCTCGTATTCATGGTCTTGATGAAGTAATGGCGGGTGAATTAGTAGAATTTCAAGAGGGTACAGTAGGTATTGCTCTTAATTTGGAATCAACAAATGTCGGTGTTGTATTAATGGGTGATGGTTTGCTGATACAAGAAGGAAGTTCTGTAAAAGCAACAGGAAGAATTGCCCAGATACCCGTGAGTGAGGCCTATTTGGGTCGTGTTGTAAATGCCCTGGCTAAACCTATTGATGGTAGGGGTGAAATTTCAGCTTCTGAATATCGGTTAATTGAATCTCCT…
	Convolvulus_arvensis	ATGGTAACCATTCAAGCCGACGAAATTAGTAATCTTATCCGTGAACGTATTGAACAATATAATAGAGAAGTCAATATTGTAAATACCGGTACCGTACTTCAAGTAGGCGATGGCATTGCCCGTATTTACGGTCTTGATGAAGTAATGGCAGGGGAATTGGTAGAATTTGAAGAGGGTACAATCGGCATTGCTCTAAATTTGGAATCAAAAAATGTTGGTGTTGTATTAATGGGCGATGGGTTGATGATACAAGAAGGAAGTTCTGTAAAAGCAACGGCAAGAATTGCTCAGATACCTGTGGGTGAAGCCTATTTGGGTCGTGTTATAAATGCCCTGGCTAACCCTATTGATGGTAGAGGCGAAATTCCAGCTTCTGAATTTCGATTAATTGAATCCCCT…
	Echinacea_angustifolia	ATGGTAACCATTCAAGCCGACGAAATTAGTAATATTATCCGTGAACGTATTGAGCAATATAATAGAGAAGTAAAGATTGTAAATACCGGTACCGTACTTCAAGTAGGTGATGGCATTGCTCGTATTCATGGTCTTGATGAAGTAATGGCGGGTGAATTAGTAGAATTTCAAGAGGGTACAGTAGGCATTGCTCTTAATTTGGAATCAACTAATGTTGGTGTTGTATTAATGGGTGATGGTTTGCTGATACAAGAAGGGAGTTCTGTAAAAGCAACAGGAAGAATTGCTCAGATACCAGTGAGTGAGGCCTATTTGGGTCGTGTTATAAACGCCCTGGCTAAACCTATTGATGGTAGAGGTGAAATTTCATCTTCTGAATATAGGTTAATTGAATCGCCC…
	Ellisia_nyctelea	ATGTCAACCATTCGAGCCGACGAAATTAGTAATATTATCCGTGAACGTATTGAACAATATAATAGAGAAGTAAAGGTTGTAAATACTGGTACCGTACTTCAAGTAGGCGATGGCATTGCTCGTATTCATGGCCTTGATGAAGTAATGGCGGGTGAATTAGTAGAATTTGAAGAGGGTACAATAGGCATTGCTCTTAATTTGGAATCAAATAATGTTGGTGTTGTATTAATGGGCGATGGTTTGATGATACAGGAAGGAAGTTCTGTAAAAGCAACAGGAAGAATTGCTCAGATACCCGTGAGTGAGGCCTATTTGGGTCGTGTTATAAATGCCCTGGCTAAACCTATTGATGGTAGAGGTGAAATTTCATCTTCTGAATCTCGATTAATTGAATCTCCT…
	Erigeron_bellidiastrum	ATGGTAACCATTCAAGCCGACGAAATTAGTAATATTATCCGTGAACGTATTGAGCAATATAATAGAGAAGTAAAGATTGTAAATACCGGTACCGTACTTCAAGTAGGCGATGGGATCGCTCGTATTCATGGTCTTGATGAAGTAATGGCGGGTGAATTAGTAGAATTTGAAGAAGGTACGATAGGCATTGCTCTTAATTTGGAATCAACTAATGTTGGCGTTGTATTAATGGGTGATGGTTTGCTGATACAAGAAGGGAGTTCTGTAAAAGCAACAGGAAGAATTGCTCAGATACCAGTGAGTGAGGCCTTTTTGGGTCGTGTTGTAAACGCCCTGGCTAAACCAATTGATGGTAGAGGTGAAATTTCATCAGATGAATATAGGTTAATTGAATCGTCC…
	Erigeron_philadelphicus	ATGGTAACCATTCAAGCCGACGAAATTAGTAATATTATCCGTGAACGTATTGAGCAATATAATAGAGAAGTAAAGATTGTAAATACCGGTACCGTACTTCAAGTAGGCGATGGGATCGCTCGTATTCATGGTCTTGATGAAGTAATGGCGGGTGAATTAGTAGAATTTGAAGAAGGTACGATAGGCATTGCTCTTAATTTGGAATCAACTAATGTTGGCGTTGTATTAATGGGTGATGGTTTGCTGATACAAGAAGGGAGTTCTGTAAAAGCAACAGGAAGAATTGCTCAGATACCAGTGAGTGAGGCCTTTTTGGGTCGTGTTGTAAACGCCCTGGCTAAACCAATTGATGGTAGAGGTGAAATTTCATCAGATGAATATAGGTTAATTGAATCGTCC…
	Erigeron_strigosus	ATGGTAACCATTCAAGCCGACGAAATTAGTAATATTATCCGTGAACGTATTGAGCAATATAATAGAGAAGTAAAGATTGTAAATACCGGTACCGTACTTCAAGTAGGCGATGGGATCGCTCGTATTCATGGTCTTGATGAAGTAATGGCGGGTGAATTAGTAGAATTTGAAGAAGGTACGATAGGCATTGCTCTTAATTTGGAATCAACTAATGTTGGCGTTGTATTAATGGGTGATGGTTTGCTGATACAAGAAGGGAGTTCTGTAAAAGCAACAGGAAGAATTGCTCAGATACCAGTGAGTGAGGCCTTTTTGGGTCGTGTTGTAAACGCCCTGGCTAAACCAATTGATGGTAGAGGTGAAATTTCATCAGATGAATATAGGTTAATTGAATCGTCC…
	Evolvulus_nuttallianus	ATGGTAACCATTCGAGCCGACGAAATTAGTAATATTCTCCGTGAACGTATTGAACAATATACTAGCGAAGTAAAGATTGTAAATACTGGTACCGTACTTCAAGTAGGCGATGGTATTGCTCGTATTCACGGTCTTGATGAAGTAATGGCCGGGGAATTGGTAGAATTTGAAGAGGGTACAATCGGCATTGCTCTCAATTTGGAATCAAATAATGTTGGTGTTGTATTAATGGGCGATGGGTTGATGATACAAGAAGGAAGTTCTGTAAAAGCAACGGCAAGAATTGCTCAGATACCAGTGGGGGAAGCCTTTTTGGGTCGTGTTATAAATGCCCTGGCTAACCCTATTGATGGTAGAGGCGAAATTTCAGCTTCTGAATTTCGATTAATTGAATCCCCT…
	Galium_aparine	ATGGTAACCATTCGAGCTGACGAAATTAGTAATATTATTCGGGAACGCATTGAACACTATAATAGAGAAGTAAAGGTTGTAAATACTGGTACTGTGCTTCAAGTGGGCGATGGTATTGCTCGTATTCATGGTCTTGATGAGGTGATGGCGGGCGAATTAGTAGAATTTGAAGAAGGGACAATAGGCATTGCTCTTAATTTGGAATCAAATAATGTTGGTGTTGTATTAATGGGCGATGGTTTGATGATACAAGAGGGAAGCTCTGTAAAAGCAACAGGACGAATTGCTCAGATACCAGTGAGTGAGGGTTATTTGGGACGTGTTATAAATGCCCTAGCTAAACCTATTGACGGGAGAGGTGAAATTTCATCTTCCGAATCTCGATTAATTGAATCTCCT…
	Grindelia_squarrosa_var_squarrosa	ATGGTAACCATTCAAGCCGACGAAATTAGTAATATTATCCGTGAACGTATTGAGCAATATAATAGAGAAGTAAAGATTGTAAATACCGGTACCGTACTTCAAGTAGGTGATGGGATTGCTCGTATTCATGGTCTTGATGAAGTAATGGCGGGTGAATTAGTAGAATTTGAAGAAGGTACGATAGGCATTGCTCTTAATTTGGAATCAACTAATGTTGGCGTTGTATTAATGGGTGATGGTTTGCTGATACAAGAAGGGAGTTCTGTAAAAGCAACAGGAAGAATTGCTCAGATACCAGTGAGTGAGGCCTATTTGGGTCGTGTTGTAAATGCCCTGGCTAAACCAATTGATGGTAGAGGTGAAATTTCATCAGATGAATATAGGTTAATTGAATCGTCC…
	Gutierrezia_sarothrae	ATGGTAACCATTCAAGCCGACGAAATTAGTAATATTATCCGTGAACGTATTGAGCAATATAATAGAGAAGTAAAGATTGTAAATACCGGTACCGTACTTCAAGTAGGTGATGGGATTGCTCGTATTCATGGTCTTGATGAAGTAATGGCGGGTGAATTAGTAGAATTTGAAGAAGGTACGATAGGCATTGCTCTTAATTTGGAATCAACTAATGTTGGCGTTGTATTAATGGGTGATGGTTTGCTGATACAAGAAGGGAGTTCTGTAAAAGCAACAGGAAGAATTGCTCAGATACCAGTGAGTGAGGCCTATTTGGGTCGTGTTGTAAATGCCCTGGCTAAACCAATTGATGGTAGAGGTGAAATTTCATCAGATGAATATAGGTTAATTGAATCGTCC…
	Helianthus_annuus	ATGGTAACCATTCAAGCCGACGAAATTAGTAATATTATCCGTGAACGTATTGAGCAATATAATAGAGAAGTAAAGATTGTAAATACCGGTACCGTACTTCAAGTAGGTGATGGCATTGCTCGTATTCATGGTCTTGATGAAGTAATGGCGGGTGAATTAGTAGAATTTCAAGAGGGTACAATAGGCATTGCTCTTAATTTGGAATCAACTAATGTTGGTGTTGTATTAATGGGTGATGGTTTGCTGATACAAGAAGGGAGTTCTGTAAAAGCAACAGGAAAAATTGCTCAGATACCAGTGAGTGAGGCCTATTTGGGTCGTGTTATAAACGCCCTGGCTAAACCTATTGATGGTAGAGGTGAAATTTCATCTTCTGAATATAGATTAATTGAATCGCCC…
	Helianthus_pauciflorus_subsp_subrhomboideus	ATGGTAACCATTCAAGCCGACGAAATTAGTAATATTATCCGTGAACGTATTGAGCAATATAATAGAGAAGTAAAGATTGTAAATACCGGTACCGTACTTCAAGTAGGTGATGGCATTGCTCGTATTCATGGTCTTGATGAAGTAATGGCGGGTGAATTAGTAGAATTTCAAGAGGGTACAGTAGGCATTGCTCTTAATTTGGAATCAACTAATGTTGGTGTTGTATTAATGGGTGATGGTTTGCTGATACAAGAAGGGAGTTCTGTAAAAGCAACAGGAAAAATTGCTCAGATACCAGTGAGTGAGGCCTATTTGGGTCGTGTTATAAACGCCCTAGCTAAACCTATTGATGGTAGAGGTGAAATTTCATCTTCTGAATATAGATTAATTGAATCGCCC…
	Helianthus_petiolaris	ATGGTAACCATTCAAGCCGACGAAATTAGTAATATTATCCGTGAACGTATTGAGCAATATAATAGAGAAGTAAAGATTGTAAATACCGGTACCGTACTTCAAGTAGGTGATGGCATTGCTCGTATTCATGGTCTTGATGAAGTAATGGCGGGTGAATTAGTAGAATTTCAAGAGGGTACAATAGGCATTGCTCTTAATTTGGAATCAACTAATGTTGGTGTTGTATTAATGGGTGATGGTTTGCTGATACAAGAAGGGAGTTCTGTAAAAGCAACAGGAAAAATTGCTCAGATACCAGTGAGTGAGGCCTATTTGGGTCGTGTTATAAACGCCCTGGCTAAACCTATTGATGGTAGAGGTGAAATTTCATCTTCTGAATATAGATTAATTGAATCGCCC…
	Helianthus_tuberosus	ATGGTAACCATTCAAGCCGACGAAATTAGTAATATTATCCGTGAACGTATTGAGCAATATAATAGAGAAGTAAAGATTGTAAATACCGGTACCGTACTTCAAGTAGGTGATGGCATTGCTCGTATTCATGGTCTTGATGAAGTAATGGCGGGTGAATTAGTAGAATTTCAAGAGGGTACAGTAGGCATTGCTCTTAATTTGGAATCAACTAATGTTGGTGTTGTATTAATGGGTGATGGTTTGCTGATACAAGAAGGGAGTTCTGTAAAAGCAACAGGAAAAATTGCTCAGATACCAGTGAGTGAGGCCTATTTGGGTCGTGTTATAAACGCCCTAGCTAAACCTATTGATGGTAGAGGTGAAATTTCATCTTCTGAATATAGATTAATTGAATCGCCC…
	Heliopsis_helianthoides_var_occidentalis	ATGGTAACCATTCAAGCCGACGAAATTAGTAATATTATCCGTGAACGTATTGAGCAATATAATAGAGAAGTAAAGATTGTAAATACCGGTACCGTACTTCAAGTAGGTGATGGCATTGCTCGTATTCATGGTCTTGATGAAGTAATGGCGGGTGAATTAGTAGAATTTCAAGAGGGTACAGTAGGCATTGCTCTTAATTTGGAATCAACTAATGTTGGTGTTGTATTAATGGGTGATGGTTTGCTGATACAAGAAGGGAGTTCTGTAAAAGCAACAGGAAGAATTGCTCAGATACCGGTGAGTGAGGCCTATTTGGGTCGTGTTATAAACGCCCTGGCTAAACCTATTGATGGTAGAGGTGAAATTTCATCTTCTGAATATAGGTTAATTGAATCGCCC…
	Heterotheca__stenophylla_var_stenophylla	ATGGTAACCATTCAAGCCGACGAAATTAGTAATATTATCCGTGAACGTATTGAGCAATATAATAGAGAAGTAAAGATTGTAAATACCGGTACCGTACTTCAAGTAGGTGATGGGATTGCTCGTATTCATGGTCTTGATGAAGTAATGGCGGGTGAATTAGTAGAATTTGAAGAAGGTACGATAGGCATTGCTCTTAATTTGGAATCAACTAATGTTGGCGTTGTATTAATGGGTGATGGTTTGCTGATACAAGAGGGGAGTTCTGTAAGAGCAACAGGAAGAATTGCTCAGATACCAGTGAGTGAGGCCTATTTGGGTCGTGTTGTAAATGCCCTGGCTAAACCAATTGATGGTAGAGGTGAAATTTCATCAGATGAATATAGGTTAATTGAGTCGTCC…
	Heterotheca__villosa	ATGGTAACCATTCAAGCCGACGAAATTAGTAATATTATCCGTGAACGTATTGAGCAATATAATAGAGAAGTAAAGATTGTAAATACCGGTACCGTACTTCAAGTAGGTGATGGGATTGCTCGTATTCATGGTCTTGATGAAGTAATGGCGGGTGAATTAGTAGAATTTGAAGAAGGTACGATAGGCATTGCTCTTAATTTGGAATCAACTAATGTTGGCGTTGTATTAATGGGTGATGGTTTGCTGATACAAGAGGGGAGTTCTGTAAGAGCAACAGGAAGAATTGCTCAGATACCAGTGAGTGAGGCCTATTTGGGTCGTGTTGTAAATGCCCTGGCTAAACCAATTGATGGTAGAGGTGAAATTTCATCAGATGAATATAGGTTAATTGAGTCGTCC…
	Hymenopappus_tenuifolius	ATGGTAACCATTCAAGCCGACGAAATTAGTAATATTATCCGTGAACGTATTGAGCAATATAATAGAGAAGTAAAGATTGTAAATACCGGTACCGTACTTCAAGTAGGTGATGGCATTGCTCGTATTCATGGTCTTGATGAAGTAATGGCGGGTGAATTAGTAGAATTTCAAGAGGGTACAATAGGCATTGCTCTTAATTTGGAATCAACTAATGTTGGTGTTGTATTAATGGGTGATGGTTTGCTGATACAAGAAGGGAGTTCTGTAAAAGCAACAGGAAGAATTGCTCAGATACCAGTGAGTGAGGCCTTTTTGGGTCGTGTTATAAATGCCCTGGCTAAACCTATTGATGGTAGAGGTGAAATTTCATCTTCTGAATATAGGTTAATTGAATCGCCC…
	Imaptiens_capensis	ATGGTAACCATTCGAGCCGACGAAATTAGTAATATTATCCGTGAACGTATTGAGCAATATAATAGAGAAATAAAGATTGTAAATACCGGTACTGTACTTCAAGTAGGCGATGGTATTGCTCGCATTCATGGGCTTGATGAAGTAATGGCTGGTGAATTAGTCGAATTTGAAGAAGGTACAATAGGCATTGCTCTAAATTTGGAATCAAATAATGTTGGTGTTGTATTAATGGGTGATGGTTTGATGATCCAAGAAGGAAGTTCTGTAAAAGCAACAGGAAAAATTGCTCAGATACCAGTGAGTGAGGCCTATTTAGGTCGTGTTATAAATGCCCTGGCTAAACCGATTGATGGGAGAGGTGAAATTTTAGCTTCTGAATCTCGGTTAATTGAATCTCCT…
	Ipomoea_leptophylla	ATGGTAACCATTCAAGCCGACGAAATTAGTAATCTTATCCGTGAACGTATTGAACAATATAATAGAGAAGTCAATATTGTAAATACCGGTACCGTACTTCAAGTAGGCGATGGCATTGCTCGTATTTACGGTCTTGATGAAGTAATGGCAGGGGAATTGGTAGAATTTGAAGAGGGTACAATCGGCATTGCTCTCAATTTGGAACCAAAAAATGTTGGTGTTGTATTAATGGGCGATGGGTTGATGATACAAGAAGGAAGTTCTGTAAAAGCAACGGCAAGAATTGCTCAGATACCAGTGGGTGAAGCCTATTTGGGTCGTGTTATAAATGCCCTGGCTAACCCTATTGATGGTAGGGGCGAAATTTCAGCTTCTGGATTTCGATTAATTGAATCCCCT…
	Lactuca_ludoviciana	ATGGTAACCATTCAAGCCGACGAAATTAGTAATATTATCCGTGAACGTATTGAGCAATATAATAGAGAAGTAAAGATTGTAAATACCGGTACCGTACTTCAAGTAGGTGATGGCATTGCTCGTATTCATGGTCTTGATGAAGTAATGGCGGGTGAATTAGTAGAATTTGAAGAGGGTACAATAGGCATTGCTCTTAATTTGGAATCAACTAATGTTGGTGTTGTATTAATGGGTGATGGTTTGCTGATACAAGAAGGGAGTTCTGTAAAAGCAACAGGAAGAATTGCTCAGATACCAGTGAGTGAGGCCTATTTGGGTCGTGTTATAAACGCGCTGGCTAAACCTATTGATGGTAGAGGTGAAATTTCATCTTCTGAATATAGGTTAATTGAATCGCCC…
	Liatris_glabrata	ATGGTAACCATTCAAGCCGACGAAATTAGTAATATTATCCGTGAACGTATTGAGCAATATAATAGAGAAGTAAAGATTGTAAATACCGGTACCGTACTTCAAGTAGGTGATGGCATTGCTCGTATTCATGGTCTTGATGAAGTAATGGCGGGTGAATTAGTAGAATTTCAAGAGGGTACAATAGGCATTGCTCTTAATTTGGAATCAACTAATGTTGGTGTTGTATTAATGGGTGATGGTTTGCTGATACAAGAAGGGAGTTCTGTAAAAGCAACAGGAAGAATTGCTCAGATACCAGTGAGTGAGGCCTATTTGGGTCGTGTTATAAACGCCCTGGCTAAACCTATTGATGGTAGAGGTGAAATTTCATCTTCTGAATATAGGTTAATTGAATCGCCC…
	Lygodesmia_juncea	ATGGTAACCATTCAAGCCGACGAAATTAGTAATATTATCCGTGAACGTATTGAGCAATATAATAGAGAAGTAAAGGTTGTAAATACCGGTACCGTACTTCAAGTAGGTGATGGCATTGCTCGTATTCATGGTCTTGATGAAGTAATGGCGGGTGAATTAGTAGAATTTGAAGAGGGTACAATAGGCATTGCTCTTAATTTGGAATCAACTAATGTGGGTGTTGTATTAATGGGTGATGGTTTGCTGATACAAGAAGGGAGTTCTGTAAAAGCAACAGGAAGAATTGCTCAGATACCAGTGAGTGAGGCCTATCTGGGTCGTGTTATAAATGCGCTGGCTAAACCTATTGATGGTAGAGGTGAAATTTCATCTTCTGAATATAGGTTAATTGAATCGCCC…
	Monarda_fistulosa_var_mollis	ATGGTAACTATTCGAGCCGACGAAATTAGTAATATTATCCGTGAACGTATTGAAGAATATAATAGAGAAGTCAAGATTGTAAACACCGGCACCGTACTTCAAGTAGGCGACGGTATTGCTCGTATCCATGGTCTTGATGAAGTAATGGCGGGTGAATTAGTCGAATTTGAAGAAGGTACAATAGGTATTGCTCTGAATTTGGAATCAAATAATGTTGGTGTTGTATTAATGGGTGATGGTTTGATGATACAAGAAGGAAGTTCTGTAAAAGCAACAGGAAGAATTGCTCAGATACCTGTGAGTGCGTCTTATTTGGGCCGTGTTGTAAACGCCCTGGCTAAGCCTATTGATGGCAGGGGGGAAATTTCAGCTTCTGAATCTCGATTAATTGAATCTCCC…
	Nepeta_cataria	ATGGTAACTATTCGAGCCGACGAAATTAGTAATATTATCCGTGAACGTATTGAACAATATAATAGAGAAGTCAAGATTGTAAACACCGGCACCGTACTTCAAGTAGGCGACGGTATTGCTCGTATTCATGGTCTTGATGAAGTAATGGCGGGTGAATTAGTCGAATTTGAAGAAGGTACAATAGGTATTGCTCTGAATTTGGAATCAAATAATGTTGGTGTTGTATTAATGGGTGATGGTTTGATGATACAAGAAGGAAGTTCTGTAAAAGCAACAGGAAGAATTGCTCAGATACCTGTGAGTACGTCTTATTTGGGCCGTGTTATAAACGCCCTGGCTAAACCTATTGATGGCAGGGGGGAAATTTCATCTTCTGAATCTCGATTAATTGAATCTCCC…
	Penstemon_angustifolius	ATGGTAACCATTCGAGCCGACGAAATTAGTAATATTATCCGTGAACGTATTGAACAATATAATAGAGAAGTCAAGGTTGTAAATACTGGTACCGTACTTCAAGTGGGCGATGGTATTGCTCGTATTCATGGTCTTGATGAAGTAATGGCGGGTGAATTAGTCGAATTTGAAGAGGGTACAATAGGCATTGCTCTTAATTTGGAATCAAATAATGTTGGTGTTGTATTAATGGGTGATGGGTTGATGATACAAGAAGGAAGTTCTGTAAAAGCAACAGGAAGGATTGCTCAAATACCCGTGAGTGAGGCTTATTTGAGCCGTGTTGTAAACGCCCTAGCTAAACCTATTGATGGTAGAGGTGAAATTTCATCTTCTGAATCTCGATTAATTGAATCTCCC…
	Penstemon_gracilis	ATGGTAACCATTCGAGCCGACGAAATTAGTAATATTATCCGTGAACGTATTGAACAATATAATAGAGAAGTCAAGGTTGTAAATACTGGTACCGTACTTCAAGTGGGCGATGGTATTGCTCGTATTCATGGTCTTGATGAAGTAATGGCGGGTGAATTAGTCGAATTTGAAGAAGGTACAATAGGCATTGCTCTTAATTTGGAATCAAATAATGTTGGTGTTGTATTAATGGGTGATGGGTTGATGATACAAGAAGGAAGTTCTGTAAAAGCAACAGGAAGGATTGCTCAAATACCCGTGAGTGAGGCTTATTTGAGCCGTGTTGTAAACGCCCTAGCTAAACCTATTGATGGTAGAGGTGAAATTTCAGCTTCTGAATCTCGATTAATTGAATCTCCC…
	Physalis_heterophylla	ATGGTAACCATTCGAGCTGACGAAATTAGTAATATTATCCGTGAACGTATTGAACAATATAATAGAGAAGTAAAGATTGTAAATACCGGTACCGTACTTCAAGTAGGCGATGGCATTGCTCGTATTCACGGTCTTGATGAAGTAATGGCGGGTGAATTAGTAGAATTTGAAGAGGGTACAATAGGCATTGCTCTGAATTTGGAATCAAATAATGTTGGTGTTGTATTAATGGGCGATGGTTTGTTGATACAAGAAGGAAGTTCTGTAAAAGCAACGGGAAGAATTGCTCAGATACCCGTGAGTGAGGCTTATTTGGGTCGTGTTGTAAATGCCCTGGCTAAACCTATTGATGGTAGAGGTGAAATTTCAGCTTCTGAATTTCGATTAATTGAATCTGCC…
	Physalis_virginiana	ATGGTAACCATTCGAGCTGACGAAATTAGTAATATTATCCGTGAACGTATTGAACAATATAATAGAGAAGTAAAGATTGTAAATACCGGTACCGTACTTCAAGTAGGCGATGGCATTGCTCGTATTCACGGTCTTGATGAAGTAATGGCGGGTGAATTAGTAGAATTTGAAGAGGGTACAATAGGCATTGCTCTGAATTTGGAATCAAATAATGTTGGTGTTGTATTAATGGGCGATGGTTTGTTGATACAAGAAGGAAGTTCTGTAAAAGCAACGGGAAGAATTGCTCAGATACCCGTGAGTGAGGCTTATTTGGGTCGTGTTGTAAATGCCCTGGCTAAACCTATTGATGGTAGAGGTGAAATTTCAGCTTCTGAATTTCGATTAATTGAATCTGCC…
	Plantago_patagonica	ATGGTAACCCTCCGAGCAGATGAAATTAGTAATATTATCCGTGAACGTATTGAACAATATAATAGAGAAGTCAGGGTTGTAAATACAGGTACCGTACTTCAAGTGGGCGATGGTATTGCTCGTATTCATGGTCTTGATGAAGTAATGGCTGGTGAATTAGTTGAATTTGAAGAAGGTACAGTAGGTATTGCTCTGAATTTGGAATCAACCAATGTCGGTGTTGTATTAATGGGTGATGGGTTGATGATAGAAGAAGGAAGTTCTGTAAAAGCAACAGGAAGAATTGCGCAGATACCGGTGAGTGAAGCTTATTTGGGTCGTGTTATAAATGCCCTGGCTAAACCTATTGATGGCAGGGGTGAAATTTCAGCTTCTGAATCTCGATTAATTGAATCTCCA…
	Ratibida_columnifera	ATGGTAACCATTCAAGCCGACGAAATTAGTAATATTATCCGTGAACGTATTGAGCAATATAATAGAGAAGTAAAGATTGTAAATACCGGTACCGTGCTTCAAGTCGGTGATGGCATTGCTCGTATTCATGGTCTTGATGAAGTAATGGCGGGTGAATTAGTAGAATTTCAAGAGGGTACAGTAGGCATTGCTCTTAATTTGGAATCAACTAATGTTGGTGTTGTATTAATGGGCGATGGTTTGCTGATACAAGAAGGGAGTTCTGTAAAAGCAACAGGAAAAATTGCTCAGATACCAGTGAGTGAGGCCTATTTGGGTCGTGTTGTAAACGCCCTGGCTAAACCTATTGATGGTAGAGGTGAAATTTCATCTTCTGAATATAGGTTAATTGAATCGCCC…
	Rudbeckia_hirta_var_pulcherrima	ATGGTAACCATTCAAGCCGACGAAATTAGTAATATTATCCGTGAACGTATTGAGCAATATAATAGAGAAGTAAAGATTGTAAATACCGGTACCGTGCTTCAAGTCGGTGATGGCATTGCTCGTATTCATGGTCTTGATGAAGTAATGGCGGGTGAATTAGTAGAATTTCAAGAGGGTACAGTAGGCATTGCTCTTAATTTGGAATCAACTAATGTTGGTGTTGTATTAATGGGTGATGGTTTGCTGATACAAGAAGGGAGTTCTGTAAAAGCAACAGGAAAAATTGCTCAGATACCAGTGAGTGAGGCCTATTTGGGTCGTGTTATAAACGCCCTGGCTAAACCTATTGATGGTAGAGGTGAAATTTCATCTTCTGAATATAGGTTAATTGAATCGCCC…
	Salvia_nemorosa	ATGGTAACTATTCGAGCCGACGAAATTAGTAATATTATCCGTGAACGTATTGAACAATATAATAGAGAAGTCAAGATTGTAAACACCGGCACCGTACTTCAAGTAGGCGACGGTATTGCTCGTATTCATGGTCTTGATGAAGTAATGGCGGGTGAATTAGTCGAATTTGAAGAAGGTACAATAGGTATTGCTCTGAATTTGGAATCAAATAATGTTGGTGTTGTATTAATGGGTGATGGTTTGATGATACAAGAAGCAAGTTCTGTAAAAGCAACAGGAAGAATTGCTCAGATACCAGTAAGTGCGGCTTATTTGGGCCGTGTTGTAAACGCCCTGGCTAAACCTATTGATGGCAGGGGGGAAATTTCAGCTTCTGAATCTCGATTAATTGAATCTCCC…
	Senecio_integerrimus	ATGGTAACCATTCAAGCCGACGAAATTAGTAATATTATCCGCGAACGTATTGAGCAATATAATAGAGAAGTAAAGATTGTAAATACCGGTACCGTACTTCAAGTAGGTGACGGCATTGCTCGTATTCATGGTCTTGATGAAGTAATGGCGGGTGAATTAGTAGAATTTCAGGAGGGTACAATAGGTATTGCTCTTAATTTGGAATCAACTAATGTTGGTGTTGTATTAATGGGTGATGGTTTGCTGATACAAGAGGGGAGTTCTGTAAAAGCAACAGGAAAAATTGCTCAGATACCAGTGAGTGAGGCCTATTTGGGTCGTGTTATAAATGCCCTGGCTAAACCTATTGATGGTAGAGGTGAAATTATATCTTCTGAATACAGGTTAATTGAATCAGCC…
	Silene_antirrhina	ATGGTAACCATTCGGGCCGACGAAATTAGCAATATTATCCGTGAACGTATTGAAAAATATAATCGAGAAGTAAAAGTTGTAAATACCGGTACCGTACTTCAAGTGGGTGACGGCATTGCTCGTATTCACGGTCTTGATGAAGTAATGGCAGGTGAATTAGTAGAATTTGAAGAGAGGACAATAGGTATTGCTCTGAATTTAGAATCAAATAATGTTGGTGTTGTATTAATGGGGGATGGTTTGCTGATACAAGAAGGAAGTTCTGTAAAAGCAACAGGAAGAATTGCTCAGATACCCGTGAGTGATGCTTATCTAGGTCGTGTTATAAATGCCTTAGCTAAACCTATTGATGGTAGAGGTGAAATTTCAACTTCTGAATCTCGGTTAATTGAATCTCCT…
	Silene_vulgaris	ATGGTAACCATTCGAGCCGACGAAATTAGCAATATTATCCGTGAACGTATTGAAAAATATAATCGAGAAGTAAAAGTTGTAAATACTGGTACCGTACTTCAAGTGGGTGACGGTATTGCTCGTATTCACGGTCTTGATGAAGTAATGGCAGGTGAATTAGTAGAATTTGAAGAGAGGACAATAGGTATTGCTCTGAATTTAGAATCAAATAATGTTGGTGTTGTATTAATGGGTGATGGTTTGTTGATACAAGAAGGAAGTTCTGTAAAAGCAACAGGAAGAATTGCTCAGATACCCGTGAGTGATGCTTATCTAGGTCGTGTTATAAATGCCTTAGCTAAACCTATTGATGGTAGAGGTGAAATTTCAACTTCTGAATCTCGGTTAATTGAATCTCCC…
	Silphium_integrifolum	ATGGTAACCATTCAAGCCGACGAAATTAGTAATATTATCCGTGAACGTATTGAGCAATATAATAGAGAAGTAAAGATTGTAAATACCGGTACCGTACTTCAAGTAGGTGATGGCATTGCTCGTATTCATGGTCTTGATGAAGTAATGGCGGGTGAATTAGTAGAATTTCAAGAGGGTACAGTAGGCATTGCTCTTAATTTGGAATCAACTAATGTTGGTGTTGTATTAATGGGTGATGGTTTGCTGATACAAGAAGGGAGTTCTGTAAAAGCAACAGGAAAAATTGCTCAGATACCAGTGAGTGAGGCCTATTTGGGTCGTGTTATAAACGCCCTGGCTAAACCTATTGATGGTAGAGGTGAAATTTCATCTTCTGAATATAGGTTAATTGAATCGCCC…
	Solanum_carolinense	ATGGTAACCATTCGAGCTGACGAAATTAGTAATATTATCCGTGAACGTATTGAACAATATAATAGAGAAGTAAAGATTGTAAATACCGGTACCGTACTTCAAGTAGGCGATGGCATTGCTCGTATTCACGGTCTTGATGAAGTAATGGCGGGTGAATTAGTAGAATTTGAAGAGGGTACAATAGGCATTGCTCTGAATTTGGAATCAAATAATGTTGGTGTTGTATTAATGGGCGACGGTTTGTTGATACAAGAAGGAAGTTCTGTAAAAGCAACGGGAAGAATTGCTCAGATACCCGTGAGTGAGGCTTATTTAGGTCGTGTTGTAAATGCCCTGGCTAAACCTATTGATGGTAGAGGTGAAATTTCAGCTTCTGAATTTCGATTAATTGAATCTGCC…
	Solanum_rostratum	ATGGTAACCATTCGAGCTGACGAAATTAGTAATATTATCCGTGAACGTATTGAACAATATAATAGAGAAGTAAAGATTGTAAATACCGGTACCGTACTTCAAGTAGGCGATGGCATTGCTCGTATTCACGGTCTTGATGAAGTAATGGCGGGTGAATTAGTAGAATTTGAAGAGGGTACAATAGGCATTGCTCTGAATTTGGAATCAAATAATGTTGGTGTTGTATTAATGGGCGACGGTTTGTTGATACAAGAAGGAAGTTCTGTAAAAGCAACGGGAAGAATTGCTCAGATACCCGTGAGTGAGGCTTATTTGGGTCGTGTTGTAAATGCCCTGGCTAAACCTATTGATGGTAGAGGTGAAATTTCAGCTTCTGAATTTCGATTAATTGAATCTGCC…
	Solanum_triflorum	ATGGTAACCATTCGAGCTGACGAAATTAGTAATATTATCCGTGAACGTATTGAACAATATAATAGAGAAGTAAAGGTTGTAAATACCGGTACCGTACTTCAAGTAGGCGATGGCATTGCTCGTATTCACGGTCTTGATGAAGTAATGGCGGGTGAATTAGTAGAATTTGAAGAGGGTACAATAGGCATTGCTCTGAATTTGGAATCAAATAATGTTGGTGTTGTATTAATGGGCGACGGTTTGTTGATACAAGAAGGAAGTTCTGTAAAAGCAACGGGAAGAATTGCTCAGATACCCGTGAGTGAGGCTTATTTGGGTCGTGTTGTAAATGCCCTGGCTAAACCTATTGATGGTAGAGGTGAAATTTCAGCTTCTGAATTTCGATTAATTGAATCTGCC…
	Solidago_gigantea	ATGGTAACCATTCAAGCCGACGAAATTAGTAATATTATCCGTGAACGTATTGAGCAATATAATAGAGAAGTAAAGATTGTAAATACCGGTACCGTACTTCAAGTAGGTGATGGGATTGCTCGTATTCATGGTCTTGATGAAGTAATGGCGGGTGAATTAGTAGAATTTGAAGAAGGTACGATAGGCATTGCTCTTAATTTGGAATCAACTAATGTTGGCGTTGTATTAATGGGTGATGGTTTGCTGATACAAGAAGGGAGTTCTGTAAAAGCAACAGGAAGAATTGCTCAGATACCAGTGAGTGAGGCCTATTTGGGTCGTGTTGTAAATGCCCTGGCTAAACCAATTGATGGTAGAGGTGAAATTTCATCAGATGAATATAGGTTAATTGAATCGTCC…
	Solidago_missouriensis	ATGGTAACCATTCAAGCCGACGAAATTAGTAATATTATCCGTGAACGTATTGAGCAATATAATAGAGAAGTAAAGATTGTAAATACCGGTACCGTACTTCAAGTAGGTGATGGGATTGCTCGTATTCATGGTCTTGATGAAGTAATGGCGGGTGAATTAGTAGAATTTGAAGAAGGTACGATAGGCATTGCTCTTAATTTGGAATCAACTAATGTTGGCGTTGTATTAATGGGTGATGGTTTGCTGATACAAGAAGGGAGTTCTGTAAAAGCAACAGGAAGAATTGCTCAGATACCAGTGAGTGAGGCCTATTTGGGTCGTGTTGTAAATGCCCTGGCTAAACCAATTGATGGTAGAGGTGAAATTTCATCAGATGAATATAGGTTAATTGAATCGTCC…
	Symphoricarpus_occidentalis	ATGGTAACCATTCGAGCCGACGAAATTAGTAATATTATCCGTCAACGTATTGAGCAATATAATAGAGAAGTAAAGATTGTAAATACCGGTACCGTACTTCAAGTAGGCGATGGCATTGCTCGTATTCATGGTCTTGATGAAGTAATGGCGGGTGAATTGGTAGAATTTGAAGAGGGTACAATAGGCATTGCTCTGAATTTGGAATCCAATAACGTTGGTGTTGTATTAATGGGCGGTGGTTTGATGATACAAGAAGGAAGTTCTGTAAAAGCAACAGGAAGAATTGCTCAGATACCAGTGAGTGAGGCCTATTTGGGTCGTGTTATAAATGCTCTGGCTAAACCTATTGATGGTAGAGGTGAAATTGCATCTTCTGAATATCGGTTAATTGAATCTCCC…
	Teucrium_canadense	ATGGTAACCATTCGAGCCGACGAAATTAGTAATATTATCCGTGAACGTATTGAACAATATAATAGAGAAGTCAAAATTGTAAATACCGGTACCGTACTTCAAGTAGGCGATGGTATTGCTCGTATTCATGGTCTTGATGAAGTAATGGCAGGTGAATTAGTCGAATTTGAAGAAGGTACAATAGGTATTGCTCTGAATTTGGAATCAAATAATGTTGGTGTTGTATTAATGGGTGATGGTTTGATGATACAAGAAGGAAGTTCTGTAAAAGCAACAGGAAGAATTGCTCAGATACCAGTGAGTGAGGCTTATTTGGGCCGTGTTATAAACGCCCTGGCTAAACCTATTGACGGTAGAGGAGAAATTTCAGCTTCGGAATCTCGATTAATTGAATCTCCC…
	Thelesperma_filifolium	ATGGTAACCATTCAAGCCGACGAAATTAGTAATATTATCCGTGAACGTATTGAGCAATATAATAGAGAAGTAAAGATTGTAAATACCGGTACCGTACTTCAAGTAGGTGATGGTATTGCTCGTATTCATGGTCTTGATGAAGTAATGGCAGGTGAATTAGTAGAATTTCAAGAAGGTACAATAGGCATTGCTCTTAATTTGGAATCAACTAATGTTGGTGTTGTTTTAATGGGTGATGGTTTGCTGATACAAGAAGGGAGTTCTGTAAAAGCAACAGGAAAAATTGCTCAGATACCGGTGAGTGAGGCCTATTTGGGTCGTGTTATAAACGCCCTGGCTAAACCTATTGATGGTCGAGGTGAAATTTCATCTTCTGAATATAGGTTAATTGAATCACCC…
	Tragopogon_dubius	ATGGTAACCATTCAAGCCGACGAAATTAGTAATATTATCCGTGAACGTATTGAGCAATATAATAGAGAAGTAAAGATTGTAAATACCGGTACCGTACTTCAAGTAGGTGATGGCATTGCTCGTATTCATGGTCTTGATGAAGTAATGGCGGGTGAATTAGTAGAATTTGAAGAGGGTACAATAGGCATTGCTCTTAATTTGGAATCAACTAATGTTGGCGTTGTATTAATGGGTGATGGTTTGCTGATACAAGAAGGCAGTTCTGTAAAAGCAACAGGAAGAATTGCTCAGATACCAGTGAGTGAGGCCTATTTGGGTCGTGTTATAAACGCCCTGGCTAAACCTATTGATGGTAGAGGTGAAATTTCATCTTCTGAATATAGGTTAATCGAATCGCCC…
	Verbascum_thapsus	ATGGTAACCATTCGAGCCGATGAAATTAGTAATATTATCCGTGAACGTATTGAACAATATAATAGAGAAGTCAAGATTGTAAATACCGGTACCGTACTTCAAGTGGGCGATGGTATTGCTCGTATTCATGGTCTTGATGAAGTAATGGCGGGTGAATTAGTCGAATTTGAAGAAGGTACAATAGGTATTGCTCTGAATTTGGAATCAAATAATGTTGGTGTTGTATTAATGGGTGATGGTTTGCTGATACAAGAAGGAAGTTCTGTAAAAGCAACAGGAAGAATTGCTCAGATACCGGTGAGTGAGGCTTATTTGGGTCGTGTTATAAATGCCCTGGCTAAACCTATTGATGGTAGAGGTGAAATTTCAGCTTCTGAATCTCGATTAATTGAATCTCCC…
	Verbena_hastata	ATGGTAACCATTCGAGCCGACGAAATTAGTAATATTATCCGTGAACGTATTGAACAATATAATAGAGAAGTCAAGATTGTAAATACCGGTACCGTACTTCAAGTGGGTGATGGTATTGCTCGTATTCATGGTCTTGATGAAGTAATGTCGGGTGAATTAGTCGAATTTGAAGAAGGTACAATAGGTATTGCTCTGAATTTGGAATCAAATAATGTTGGTGTTGTATTAATGGGTGATGGTTTGATGATCCAAGAAGGAAGTTCTGTAAAAGCAACAGGAAGAATTGCTCAGATACCCGTGAGTGAGGCTTATTTGGGCCGTGTTATAAACGCCCTGGCTAAACCTATTGATGGTAGAGGTGACATTTCAGCTTCTGAATCTCGATTAATTGAATCTCCT…
	Vernonia_baldwinii	ATGGTAACCATTCAAGCCGACGAAATTAGTAATATTATCCGTGAACGTATTGAGCAATATAATAGAGAAGTAAAGATTGTAAATACCGGTACCGTACTTCAAGTAGGTGATGGCATTGCTCGTATTCATGGTCTTGATGAAGTAATGGCGGGTGAATTAGTAGAATTTGAAGAGGGTACAATAGGCATTGCTCTTAATTTGGAATCAACTAATGTTGGTGTTGTATTAATGGGTGATGGTTTGCTGATACAAGAAGGGAGTTCTGTAAAAGCAACAGGACGAATTGCTCAGATACCAGTGAGTGAGGCCTATTTGGGTCGTGTTATAAACGCCCTGGCTAAACCTATTGATGGTAGAGGTGAAATTTCATCTTCTGAATATAGGTTAATTGAATCGCCC…
	Veronica_americana	ATGGGAACCATTCGAGCCGACGAAATTAGTAATATTATCCGTGAACGTATTGAACAATATAATAGAGAAGTCAAGATTGTAAATACCGGTACCGTACTTCAAGTGGGCGATGGTATTGCTCGTATTCATGGTCTTGATGAAGTAATGTCGGGTGAATTAGTAGAATTTGCAGAAGGTACAGTAGGTATTGCTCTGAATTTGGAATCAACTAATGTTGGTGTTGTATTAATGGGTGATGGGTTGATGATACAAGAAGGAAGTTCCGTAAAAGCAACAGGAAGAATTGCTCAGATACCGGTGAGTGAGGCTTATTTGGGTCGTGTTGTAAATGCCTTGGCTAAACCTATTGATGGCAGAGGTGAAATCTCAGCTTCTGAATCTCGATTAATTGAATCTCCC…
	Xanthisma_spinulosum	ATGGTAACCATTCAAGCCGACGAAATTAGTAATATTATCCGTGAACGTATTGAGCAATATAATAGAGAAGTAAAGATTGTAAATACCGGTACCGTACTTCAAGTAGGTGATGGGATTGCTCGTATTCATGGTCTTGATGAAGTAATGGCGGGTGAATTAGTAGAATTTGAAGAAGGTACGATAGGCATTGCTCTTAATTTGGAATCAACTAATGTTGGCGTTGTATTAATGGGTGATGGTTTGCTGATACAAGAAGGGAGTTCTGTAAAAGCAACAGGAAGAATTGCTCAGATACCAGTGAGTGAGGCCTATTTGGGTCGTGTTGTAAATGCCCTGGCTAAACCAATTGATGGTAGAGGTGAAATTTCATCAGATGAATATAGGTTAATAGAATCGTCC…
	Zizia_aurea	ATGGTAACAATTCGAGCCGACGAAATTAGTAAGATTATCCGTGAGCGAATTGAGGAATATAATAGAGAAGTAAAGATTGTAAATACCGGTACCGTACTGCAAGTAGGTGACGGCATTGCTCGTATTCATGGTCTTGATGAAGTAATGGCGGGTGAATTAGTAGAATTTCAAGAGGGTACAGTAGGTATTGCTCTTAATTTGGAATCAACAAATGTCGGTGTTGTATTAATGGGTGATGGTTTGCTGATACAAGAAGGAAGTTCTGTAAAAGCAACAGGAAGAATTGCTCAGATACCCGTGAGTGAGGCCTATTTGGGTCGTGTTGTAAATGCCCTGGCTAAACCTATCGATGGTAGGGGTGAAATTTCAGCTTCTGAATATCGGTTAATTGAATCTCCT…
;
end;
