# Supplementary material for: Biodiversity assessment among two Nebraska prairies: a comparison between traditional and phylogenetic diversity indices
Source: Biodivers Data J. 2015 Jul 17;(3):e5403. doi: 10.3897/BDJ.3.e5403 (PMC4549632; doi:10.3897/BDJ.3.e5403)
Supplement: Supplementary material 8 — matK Nexus file [file biodiversity_data_journal-3-e5403-s008.nex]

#NEXUS
begin taxa;
	dimensions ntax=65;
	taxlabels
	Achillea_millefolium
	Androsace_occidentalis
	Antennaria_howellii_subsp_neodica
	Antennaria_neglecta
	Asclepias_syriaca
	Asclepias_verticillata
	Campanula_rotundifolia
	Carduus_nutans
	Cicuta_maculata
	Cirsium_canescens
	Cirsium_undulatum
	Comandra_umbellata
	Conium_maculatum
	Convolvulus_arvensis
	Echinacea_angustifolia
	Ellisia_nyctelea
	Erigeron_bellidiastrum
	Erigeron_philadelphicus
	Erigeron_strigosus
	Evolvulus_nuttallianus
	Galium_aparine
	Grindelia_squarrosa_var_squarrosa
	Gutierrezia_sarothrae
	Helianthus_annuus
	Helianthus_pauciflorus_subsp_subrhomboideus
	Helianthus_petiolaris
	Helianthus_tuberosus
	Heliopsis_helianthoides_var_occidentalis
	Heterotheca__stenophylla_var_stenophylla
	Heterotheca__villosa
	Hymenopappus_tenuifolius
	Imaptiens_capensis
	Ipomoea_leptophylla
	Lactuca_ludoviciana
	Liatris_glabrata
	Lygodesmia_juncea
	Monarda_fistulosa_var_mollis
	Nepeta_cataria
	Penstemon_angustifolius
	Penstemon_gracilis
	Physalis_heterophylla
	Physalis_virginiana
	Plantago_patagonica
	Ratibida_columnifera
	Rudbeckia_hirta_var_pulcherrima
	Salvia_nemorosa
	Senecio_integerrimus
	Silene_antirrhina
	Silene_vulgaris
	Silphium_integrifolum
	Solanum_carolinense
	Solanum_rostratum
	Solanum_triflorum
	Solidago_gigantea
	Solidago_missouriensis
	Symphoricarpus_occidentalis
	Teucrium_canadense
	Thelesperma_filifolium
	Tragopogon_dubius
	Verbascum_thapsus
	Verbena_hastata
	Vernonia_baldwinii
	Veronica_americana
	Xanthisma_spinulosum
	Zizia_aurea
;
end;
begin characters;
	dimensions nchar=1737;
	format datatype=dna missing=? gap=-;
	matrix
	Achillea_millefolium	ATGGAGAAATTCCAAAGCTATTTAGGGCTAGATAGATCT---CAACAACAC------TCTTTCTTATATCCACTTATCTTTCAGGAGTATATTTATGTACTTGCTCATGATCATGG------TTTAA---------------ATAGA------TCTATTTTG---------------TTGGAAAATGTAGGTTATGACAATAAATTCAGCTTACTAATTGTGAAACG------------TTTAATCATTCGAATGTATC------AACAGAATCATTTTATTCTTT---CTGTTAATGATTCTAAA------CA------ATTGTTGGGGCACAACAATA------TTTTTTATTCGCAAGTAATGTCAGAGGTTTCTTCAATCATTCTGGAAATTCCA…
	Androsace_occidentalis	ATGGAGGAATTCAAAAGATATTTAGAACTAAATAGATCT---CAGCAGCGT------GACTTCCTGCATCCGCTTCTATTTCAGGAGTATATTTATGCACTTGCTCATGATCACAG------TTTAA---------------CTAGA------TCCATTTCGTTGGAA---------TTGGAAAAGGTAGGTTATGAGAATAACTTCAGCTTACTAATTGCGAAACGTTTAATTACTCATTTAATTACTCAAATGGATC------GACAGAATCCGTTGAGTTTTT---TGACTAATGATTCGAACCAAAATCAAAATCCATTTTTGGGGCACAACACAC------TTTTGTATTCTCAAATTATATTAGAAGGATTTGTAGTCGTTGTGGAAATTCCC…
	Antennaria_howellii_subsp_neodica	ATGGAGAAATTCCAAAGCTATTTAGGGCTAGATAGATCT---CAACAACAC------TACTTCTTATATCCACTTATCTTTCAGGAGTATATTTATGTACTTGCTCATGATTATGG------TTTAA---------------ATAGA------TCCATTTTG---------------TTGGAAAATTCAGGTTATGACAATAAATCCAGCTTACTAATTGTGAAACG------------TTTAATCATTCGAATGTATC------AACAGAATAATTTGATTCTTT---CTGTTAATGATTCTAAA------CAGACTCCTTTTTTCGGGAACAACAAGA------ATTTTTATTCGCAAGTAATGTCAGAGGTTTCTTCAATTATTATGGAAATTCCA…
	Antennaria_neglecta	ATGGAGAAATTCCAAAGCTATTTAGGGCTAGATAGATCT---CAACAACAC------TACTTCTTATATCCACTTATCTTTCAGGAGTATATTTATGTACTTGCTCATGATTATGG------TTTAA---------------ATAGA------TCCATTTTG---------------TTGGAAAATTCAGGTTATGACAATAAATCCAGCTTACTAATTGTGAAACG------------TTTAATCATTCGAATGTATC------AACAGAATAATTTGATTCTTT---CTGTTAATGATTCTAAA------CAGACTCCTTTTTTCGGGAACAACAAGA------ATTTTTATTCGCAAGTAATGTCAGAGGTTTCTTCAATTATTATGGAAATTCCA…
	Asclepias_syriaca	ATGGAAGAAATCCAAAGATATTTACAGCTTGATAGATCT---CAACAACCC------AACTTTCTATATCCACTTATCTTTCAGGAATATATTTATGCACTTGCTCATGACCATAG------TTTAA---------------ACCGA------GCTATTTTG---------------TTGGAAAATCCGGGTTATGACAATAAATCGAGTTTCCTTATTGTGAAACG------------ATTAATTATTCTAATGTATC------AACAGAATCATTTTCTTACTT---CTATTAATGATTCTAAC------CAAAATCCATTTTTTGGCCGCAACAAAA------ATTTGTATTCTAAAATGATATCAGAGGGATTTTCATTTATTGTGGAAATTCCA…
	Asclepias_verticillata	ATGGAAGAAATCCAAAGATATTTACAGCTTGATAGATCT---CAACAACCC------AACTTTCTATATCCACTTATCTTTCAGGAATATATTTATGCACTTGCCCATGACCATAG------TTTAA---------------ACCGA------GCTAGTTTG---------------TTGGAAAATCCGGGTTATGACAATAAATCGAGTTTCCTTATTGTGAAACG------------ATTAATTATTCTAATGTATC------AACAGAATCATTTTCTTACTT---CTATTAATGATTCTAAC------CAAAATCCATTTTTTGGGCGCAACACAA------ATTTGTATTCTAAAATGATATCAGAGGGATTTTCATTTATTGTGGAAATTCCA…
	Campanula_rotundifolia	ATGGAAGAATTTCAAAGCGCTTTAGAGTTCGATAGATTT---CAACAACAT------GACTTCTTATATCCACTTATCTTTCAGGAGTATATTTATGCACTTGCTCATGATCATGG------TTTAA---------------ATGGA------TCCATTTTG---------------TTGAAAAATGTAGGTTATGGCAATAAATTCAGCTTACTAATTGTGAAACG------------GTTAATTCTTCGAATGTATG------ACCAGAATTATTTGATTCATT---CTACGAATGATTGTAAA------CAAAAGCCATTTTGGGGGCGCAGCAAGA------ATTTTGAGTCTCAAATCATATCAGAAGCATTTTCGGTCATTCTGGAAATTCCA…
	Carduus_nutans	ATGGAGAAATTCCAAAGCTATTTAGGGCTAGATAGATCT---CAACAACAC------TACTTCTTATATCCACTTATCTTTCAGGAGTATATTTATGTACTTGCTCATGATCATGG------TTTAA---------------ATAGA------TCGATTTTG---------------TTGGAAAATGCAGGTTATGACAATAAATCCAGCTTACTAATTGTGAAACG------------TTTAATCACTCGAATGTATC------AACAGAATCATTTGATTCTTT---CCGTTAATGATTCTAAA------CAGACTCCATTTTTGGGCCACAACAAGA------ATTTTTATTCGCAAGTAATGTCAGAGGTATCTTCAATCATTATGGAAATTCCA…
	Cicuta_maculata	ATGGAGGAATTTCAAAGATATTTAAAGCTAAATAGATAT---CAACAACAC------TATTTCTTATATCCACTTATCTTTCAGGAATATATTTATGCACTTGCGCATGATCATGG------TTTAAATAGAATAAATAGAGATAGA------TCTATTTTG---------------TTGGAAAATGCAGGTTCT---AATAAATTCAGCTTACTAATTGTGAAACG------------TGCAATTGAGCGAATGTATCAGTATGAACAGAATCATTTGATTCTTT---TTGCTAATGATTTTAAC------CAAAATATATTTTTTGGACGCAACAAGA------ATTTTAATTTTCAAATGATATCAGAAGGATTTGCAGTCATTGTAGAAATTCCG…
	Cirsium_canescens	ATGGAGAAATTCCAAAGCTATTTAGGGCTAGATAGATCT---CAACAACAC------TACTTCTTATATCCACTTATCTTTCAGGAGTATATTTATGTACTTGCTCATGATCATGG------TTTAA---------------ATAGA------TCGATTTTG---------------TTGGAAAATGCAGGTTATGACAATAAATCCAGCTTACTAATTGTGAAACG------------TTTAATCACTCGAATGTATC------AACAGAATCATTTGATTCTTT---CCGTTAATGATTCTAAA------CAGACTCCATTTTTGGGGCACAACAAGA------ATTTTTATTCGCAAGTAATGTCAGAGGTATCTTCAATCATTATGGAAATTCCA…
	Cirsium_undulatum	ATGGAGAAATTCCAAAGCTATTTAGGGCTAGATAGATCT---CAACAACAC------TACTTCTTATATCCACTTATCTTTCAGGAGTATATTTATGTACTTGCTCATGATCATGG------TTTAA---------------ATA---------------TG---------------TTGGAAAATGCAGGTTATGACAATAAATCCAGCTTACTAATTGTGAAACG------------TTTAATCACTCGAATGTATC------AACAGAATCATTTGATTCTTT---CCGTTAATGATTCTAAA------CAGACTCCATTTTTGGGGCACAACAAGA------ATTTTTATTCGCAAGTAATGTCAGAGGTATCTTCAATCATTATGGAAATTCCA…
	Comandra_umbellata	ATGGAGAAATTCCAAAGATATTTAGAACGAAATAGATCT---CGACAACATGACTTGAACTTTTTATATCCACTGATGTTTCAAGAGTATATTTATTCACTTACTTATGATCGTGG------TTTAA---------------CTAGA------TCAATTATA---------------TTAGAAAATGTGGGTTATGAAAAAAAATTCAGTTTACTAATTGTCAAACG------------TTTAATTACTCGAATGTATC------AACAAAATCGTTTTATTATTT---CCGCTAATGATTCTAAT------CCAAATCTATTTTTGGGGCATAATAAAG------ATTTTTATTTGCAAATGATACCAGAGGGATTTACAGTCATTGTGGAAATTCCA…
	Conium_maculatum	ATGGAGGAATTGCAAAGATATTTAAAGCTAAATAGATCT---CAACAACAC------TACTTCTTATATCCACTTATCTTTGAGGAGTATATTTATGCACTTGCGCATGATCATGG------TTTAAATATAA---------ATAGA------TCCATTTTG---------------TTGGAAAATGCGGGTTCT---AATAAATTCAGCTTACTCATTGTGAAACG------------TGCAATTGAGCGAATGTATCAGTATGAACAGAATCATTTGATTCTTT---TTGCTAATGATTTTAAC------CAAAATCCATTTTTTGGGCGCAACAATA------ATTTTAATTTTCAAATGATATCAGAAGGATTTGCAGTCATTGTAGAAATTCCG…
	Convolvulus_arvensis	ATGGAGGAAATTCAAAGATATTTACAGCCAGAAAGATCT---CAACAACAC------AACTTCCTATATCCACTTCTCTTTCAGGAGTCTATTTATGCACTTGCTCATGATCGTGG------TTTAA---------------ATAGG------TCAATTTTT---------------TTTAAAAATACGGGGTATGAAAAAAAATTGAGTTTTCAAATTGTGAAACG------------CTTAATTATTCGAATTTATC------AACAAATATATTTTAGTACTT---------ATTCTTCTAAT------AAAAGTCAAATTTTTGGGCCCAACAATA------GTTTGTATTCTAAACTGCTATCAGAGGGGTTTGCTTTTATTGTGGAAATTCCG…
	Echinacea_angustifolia	ATGGAGAAATTCCAAAGCTATTTAGGGCTAGATAGATCT---------CAC------TACTTCTTATATCCACTTATCTTTCAGGAGTATATTTATGTACTTGCTCATGATCATGG------TTTAA---------------ATGGA------TCAATTTTG---------------TTGGAAAATGCAGGTTATGACAATAAATCCAGTTTACTAATTGTGAAACG------------TTTAATCATTCGAATGTATC------AACAGAATCATTTGATCCTTT---CTGTTAATGATTCTAAA------CAGACTCCTTTTTTGGGGCACAACAAGA------ATTTTTATTCGCAAGTAATGTCAGAGGTTTCTTCAACCATTATGGAAATTCCA…
	Ellisia_nyctelea	ATGGAGGAAATTCAAAGATATTTACAGCTAGATAGATCT---CAACAACAC------GACTGCCTATATCCACTTATCTTTCAGGAGTATATTTATGCACTTGCTCATGATCATGG------ATTAA---------------ATAGA------TTGATTTTG---------------TTAGAAAATTCCGGTTATGACAATAAATCCAGTTTACTTATTGTGAAACG------------TTTAATTACTCAAATGTATC------AACAGAATCATTTTTTGATTT---CTCTTAATGATTTTAAC------CAAAATCTATTTTTGGGGCGCAACAATC------ATTTGTATTCTCAAATGATATCAGAGGTATTTGCATTTATTGTTGAAATGCCG…
	Erigeron_bellidiastrum	ATGGATAAATTCCAAAGCTATTTAGGGCTAGATAGATCT---CAACAACAC------TACTTCTTATATCCACTTATCTTTCAGGAGTATATTTATGTACTTGCTCATGATCATGG------TTTAA---------------ATAGA------TCCATTTTG---------------TTGGAAAATGCAGGTTATGACAATAAATCCAGCTTACTTCTTGTGAAACG------------TTTAATCATTCGAATGTATG------AACAGAATCATTTGATTCTTT---CTGTTAATGACTCTAAA------CAGACTCCTTTTTTGGGGCAGACCCCTC------TTTTTTATTCGCAAATAATGTCAGAGGTTTCTTCAATCATTATGGAAATTCCA…
	Erigeron_philadelphicus	ATGGATAAATTCCAAAGCTATTTAGGGCTAGATAGATCT---CAACAACAC------TACTTCTTATATCCACTTATCTTTCAGGAGTATATTTATGTACTTGCTCATGATCATGG------TTTAA---------------ATAGA------TCCATTTTG---------------TTGGAAAATGCAGGTTATGACAATAAATCCAGCTTACTTCTTGTGAAACG------------TTTAATCATTCGAATGTATG------AACAGAATCATTTGATTCTTT---CTGTTAATGACTCTAAA------CAGACTCCTTTTTTGGGGCAGACCCTTC------TTTTTTATTCGCAAATAATGTCAGAGGTTTCTTCAATCATTATGGAAATTCCA…
	Erigeron_strigosus	ATGGATAAATTCCAAAGCTATTTAGGGCTAGATAGATCT---CAACAACAC------TACTTCTTATATCCACTTATCTTTCAGGAGTATATTTATGTACTTGCTCATGATCATGG------TTTAA---------------ATAGA------TCCATTTTG---------------TTGGAAAATGCAGGTTATGACAATAAATCCAGCTTACTTCTTGTGAAACG------------TTTAATCATTCGAATGTATG------AACAGAATCATTTGATTCTTT---CTGTTAATGACTCTAAA------CAGACTCCTTTTTTGGGGCAGACCCCTC------TTTTTTATTCGCAAATAATGTCAGAGGTTTCTTCAATCATTATGGAAATTCCA…
	Evolvulus_nuttallianus	ATGGAGGAAATTCAAATAGATTTACAGCCAGAGAGATCT---CAACAACAC------AACTTCCTATATCCACTTCTCTTTCAGGAGTATATTTATGCACTTGCTCATGATTGTGGTTTAAATTTAA---------------ATAGG------TCAATTTAT---------------TTTGAAAATACAGGGTATGAAAACAAATTGAGTTTTCAAATTGTGAAACG------------CTTAATTACTCGAATGTATC------AACAGATACATTTTACTACTTATTCGTCTAATTCGTCTAAC------AAAAGTCAAATTTTTGGTCCCAACAAGA------ATTTGTATTCTAAACTGCTATCAGAGGGGTTTGCTTTTATTGTGGAAATTCCG…
	Galium_aparine	ATGGAGCAAATCAAAAGATATTTACAGCTTGATAGATCT---CAACAGTAC------GTCTTTCTATATCCACTTATCTTTCAGGAGTATATTTACGGACTTGCTCATGGTTGTAG------TTTAA---------------GCCGA------TCTCGTTTG---------------TTGGAAAATCGAGGTTATGATAATAACTACAGTTTCCTACTTGTTAAACG------------TTTAATTACTCGATTGTATC------GACAAAATGTTTTTATTATTT---TTGCTAATGATTCTAAT------AAAAATTTATTTTTTGGTTGCAACAGGA------ATTTCTACCCTCAAACGATATCAGAAGGGTTTGCATTTATTGTGGAAATTCCA…
	Grindelia_squarrosa_var_squarrosa	ATGGATAAATTCCAAAGCTATTTAGGGCTAGATAGATCT---CAACAACAC------TACTTCTTATATCCACTTATCTTTCAGGAGTATATTTATGTACTTGCTCATGATCATGG------TTTAA---------------ATAGA------TCAATTTTG---------------TTGGAAAATGCAGGTTATGACAATAAATCCAGCTTACTTATTGTGAAACG------------TTTAATCATTCGAATGTATG------AACAGAATCATTTGATTCTTT---CTGTTAATGACTCTAAA------CAGACTCCTTTTTTGGGGCAGATCAATC------ATTTTTATTCGCAAATAATGTCAGAGGTTTCTTCAATCATTATGGAAATTCCA…
	Gutierrezia_sarothrae	ATGGATAAATTCCAAAGCTATTTAGGGCTAGATAGATCT---CAACAACAC------TACTTCTTATATCCACTTATCTTTCAGGAGTATATTTATGTACTTGCTCATGATCATGG------TTTAA---------------ATAGA------TCAATTTTA---------------TTGGAAAATGCAGGTTATGACAATAAATCCAGCTTACTTATTGTAAAACG------------TTTAATCATTCGAATGTATG------AACAGAATCATTTGATTCTTT---CTGTTAATGACTCTAAA------CAGCCTCCTTCTTTGGGGCAGACCAATC------ATTTTTATTCGCAAATAATGTCAGAGGTTTCTTCAATCATTATGGAAATTCCA…
	Helianthus_annuus	ATGGAGAAATTCCAAA---------GGCTAGATAGATCT---------CAC------TACTTCTTATATCCACTTATCTTTCAGGAGTATATTTATGTACTTGCTCATGATCATGG------TTTAA---------------ATGGA------TCGATTTTG---------------TTGGAAAATGCAGGTTATGACAATAAATCCAGTTTACTAATTGTGAAACG------------TTTAATCATTCGAATGTATC------AACAGAATCATTTGATTCTTT---CTGTTAATGATTCTAAA------CAGACTGCATTTTTGGGGCACAACAAGA------ATTTTTATTCGCAAGTAATGTCAGAGGTTTCTTCAACCATTATGGAAATTCCA…
	Helianthus_pauciflorus_subsp_subrhomboideus	ATGGAGAAATTCCAAA---------GGCTAGATAGATCT---------CAC------TACTTCTTATATCCACTTATCTTTCAGGAGTATATTTATGTACTTGCTCATGATCATGG------TTTAA---------------ATGGA------TCGATTTTG---------------TTGGAAAATGCAGGTTATGACAATAAATCCAGTTTACTAATTGTGAAACG------------TTTAATCATTCGAATGTATC------AACAGAATCATTTGATTCTTT---CTGTTAATGATTCTAAA------CAGACTGCATTTTTGGGGCACAACAAGA------ATTTTTATTCGCAAGTAATGTCAGAGGTTTCTTCAACCATTATGGAAATTCCA…
	Helianthus_petiolaris	ATGGAGAAATTCCAAA---------GGCTAGATAGATCT---------CAC------TACTTCTTATATCCACTTATCTTTCAGGAGTATATTTATGTACTTGCTCATGATCATGG------TTTAA---------------ATGGA------TCGATTTTG---------------TTGGAAAATGCAGGTTATGACAATAAATCCAGTTTACTAATTGTGAAACG------------TTTAATCATTCGAATGTATC------AACAGAATCATTTGATTCTTT---CTGTTAATGATTCTAAA------CAGACTGCATTTTTGGGGCACAACAAGA------ATTTTTATTCGCAAGTAATGTCAGAGGTTTCTTCAACCATTATGGAAATTCCA…
	Helianthus_tuberosus	ATGGAGAAATTCCAAA---------GGCTAGATAGATCT---------CAC------TACTTCTTATATCCACTTATCTTTCAGGAGTATATTTATGTACTTGCTCATGATCGTGG------TTTAA---------------ATGGA------TCGATTTTG---------------TTGGAAAATGCAGGTTATGACAATAAATCCAGTTTACTAATTGTGAAACG------------TTTAATCATTCGAATGTATC------AACAGAATCATTTGATTCTTT---CTGTTAATGATTCTAAA------CAGACTGCATTTTTGGGGCACAACAAGA------ATTTTTATTCGCAAGTAATGTCAGAGGTTTCTTCAACCATTATGGAAATTCCA…
	Heliopsis_helianthoides_var_occidentalis	ATGGATAAATTCCAAAGCTATTTAGGGCTAGATAGATCT---------CAC------TACTTCTTATATCCACTTATTTTTCAGGAGTATATTTATGTACTTGCTCATGATCATGG------TTTAA---------------ATGGA------TCAACTTTG---------------TTGGAAAATGCAGGTTATGAAAATAAATCCAGTTTACTAATTGTGAAACG------------TTTAATCATTCGAATGTATC------AACAGAATCATTTGATCCTTT---TTGTTAATGATTCTAAA------CAGACTCCGTTTTTGGGGCACAACAAGA------ATTTTTATTCGCAAGTAATGTCAGAGGTTTCTTCAACCATTATGGAAATTCCA…
	Heterotheca__stenophylla_var_stenophylla	ATGGATAAATTCCAAAGCTATTTAGGGCTAGATAGATCT---CAACAACAC------TACTTCTTATATCCACTTATCTTTCAGGAGTATATTTATGTACTAGCTCATGATCATGG------TTTAA---------------ATAGA------TCAATTTTG---------------TTGGAAAATGCCGGTTATGACAATAAATCCAGCTTACTTATTGTGAAACG------------TTTAATCATTCGAATGTATG------AACAGAATCATTTGATTCTTT---CTGTTAATGACTCTAAA------CAGACTCCTTTTTTGGGGCAGACCAATC------ATTTTTATTCGCAAATAATGTCAGAGGTTTCTTCAATCATTATGGAAATTCCA…
	Heterotheca__villosa	ATGGATAAATTCCAAAGCTATTTAGGGCTAGATAGATCT---CAACAACAC------TACTTCTTATATCCACTTATCTTTCAGGAGTATATTTATGTACTAGCTCATGATCATGG------TTTAA---------------ATAGA------TCAATTTTG---------------TTGGAAAATGCCGGTTATGACAATAAATCCAGCTTACTTATTGTGAAACG------------TTTAATCATTCGAATGTATG------AACAGAATCATTTGATTCTTT---CTGTTAATGACTCTAAA------CAGACTCCTTTTTTGGGGCAGACCAATC------ATTTTTATTCGCAAATAATGTCAGAGGTTTCTTCAATCATTATGGAAATTCCA…
	Hymenopappus_tenuifolius	ATGGAGAAATTCCAAAGCTATTTAGGGCTAGATAGATCT---------CAC------TACTTCTTATATCCACTTATCTTTCAGGAGTATATTTATGTACTTGCTCATGATCATGG------TTTAA---------------ATGGA------TCGATTTTG---------------TTGGAAAATGCAGGTTATGACAATAAATCCAGTTTACTAATTGTGAAACG------------TTTAATCGTTCGAATGTATC------AACAGAATCATTTGATTCTTT---CTGTTAATGATTCTAAA------CAGACTCCATTTTTGGGGCACTACAATC------ATTTTTATTCGCAAGTAATGTCAGAGGTTTCTTCAACCATTATGGAAATTCCA…
	Imaptiens_capensis	ATGGAGGAGTTCAAAAGATATTTAGAACTAGATAGATCT---CAGCAACAG------GGCTTCCTATATTCATTTAGCTTTCAAGAGTCTATTTATACACTTGCTCATG---------------TAA---------------ATAGA------TCAATTTTA---------------------AATGCGGATTCTGACAAAAAATCTAGCTTACTAATTGTGAAATC------------TTTAATTACTCAAATGTATC------AACAAAATCATTTGATTTTTT---CTGCTAATGATCCTAAA------CAAAATTTATTTTTTGGACACAACACGG------ATTTATATTGTCAAATCCTATTCGAAGCATTTGCCGTCGTTTTGGAAATTCCA…
	Ipomoea_leptophylla	ATGGAGGAAATTCAAAGATATTTACAGCCAGAGAGATCT---CAACAACAC------AACTTCCTATATCCACTTCTCTTTCAGGAGTCTATTTATGCACTTGCTCATGATCGTGG------TTTAA---------------ATAGG------TCGATTTCT---------------TTTAAAAATACCGGGTATGAAAAAAAATTGAGTTTTCAAATTGTGAAACG------------CTTAATTACTCGAATTTATC------AACAGATCTATTTTACTACTT---------ATTCTTATAAC------AAAAGTCAAATTTTTGGGCCCAACAAGA------GTTTGTATTCTAAACTGCTATCAGAGGGGTTTGCTTTTATTGTGGAAATTCCG…
	Lactuca_ludoviciana	ATGGAGAAATTCCAAAGCTATTTAGGGCTAGATAGATCT---CAACAACAC------CACTTCTTATATCCACTTATCTTTCAGGAGTATATTTATGTACTTGCTCATGATCATGG------TTTAA---------------CTAGA------TCGATTTTG---------------TTGGAAAATGCAGGTTATGACAATAAATCCAGCTTACTAATTGTGAAACG------------TTTAATCAATCGAATGTATC------AACAGAATCATTTGATTCTTT---CGGTTAATAATTCTAAA------CAGACTCCATTTTTGGGGCACAACAAGA------ATTTTTATTCGCAAGTAATGTCAGAGGTATCTTCAATCATTATGGAAATTCCA…
	Liatris_glabrata	ATGGAGAAATTCCAAAGCTATTTAGGGATAGATAGATCT---------CAC------TACTTCTTATATCCACTTATCTTTCAGGAGTATATTTATGTACTTGCTCATGATCATGG------TTTAA---------------ATGGA------TCGATTTTG---------------TTGGAAAATGCAGATTATGACAATAAATCCAGTTTACTAATTGTGAAACG------------TTTAATCATTCGAATGTATC------AACAGAATCATTTGATTCTTT---CTATTAATGATTCTAAA------CAGATTCCATTTTTGGGGCACAACAAGAATTTTTATTTTTATTCGCAAGTAATGTCAGAGGTTTCTTCAACCATTATGGAAATTCCA…
	Lygodesmia_juncea	ATGGAGAAATTCCAAAGCTATTTAGGGCTAGATAGATCT---CAACAACAC------TACTTCTTATATCCACTTATCTTTCAGGAGTATATTTATGTACTTGCTCATGATCATGG------TTTAA---------------ATAGA------TCGATTTTG---------------TTGGAAAATGCAGGTTATGACAATAAATACAGCTTACTGATTGTGAAACG------------TTTAATCACTCGAATGTATC------AACAGAATCATTTGATTCTTT---CGGTTAATAATTCTAAA------CAGACTCCATTTTGGGGGCACAACAAGA------ATTTTTATTCGCAAGTAATCTCAGAGGTATCTTCAATCATTATGGAAATTCCA…
	Monarda_fistulosa_var_mollis	ATGGAGAAAATCCAAAGATATTTACAGCTAAAGAGATCT---CAACAACAC------GACTTCCTATATCCACTTATATTTCAGGAGTATATTTATGTGTTTGCTCATAATCGTGC------TTTGA---------------ATAGA------TCTATTTTG---------------TCGGAAAATCCGGGTTATGACAATAAATCCAGTTTACGGATTGTGAAACG------------ATTAATTACTCGAATGTATC------AACAGAATCCTTTTCTTTTTT---CTTCTAATGATTCTAAC------AAAAATCCATTTTTGGCGCGCAACAAGA------ACTTGTATTCTCAAATTATATCAGAGGGGTTTGCTTTTATTGTAGAAATTCCA…
	Nepeta_cataria	ATGGAGAAAATCCAAAAATATTTACAGCTAAAGAGATCT---CAACAACAC------GACTTTTTATATCCACTTATATTTCAGGAATATATTTATGTGTTTGCTCATAATCGTGC------TTTGA---------------ATAGA------TCTATTTTG---------------TCGGAAAATCCGGGTTATGACAATAAGTCCAGTTTACGGATTGTGAAACG------------ATTAATTACTCGAATGTATC------AACAGAATCATTTTATTATTT---CTTCGAATAATTCGAAC------AAAAATCTATTTTTGGCGCGCAACAAGA------ACTTGTATTCTCAAATTATATCAGAGGGGTTTGCTTTTATTGTAGAAATTCCA…
	Penstemon_angustifolius	ATGGAGGAAATCCAAAGATATTTACAGCTCAAGAGATCT---CAACAACAC------AATTTCCTATATCCACTTATCTTTCAGGAGTATATTTATGCGTTTGCTCATGATCGTAG------TTTCA---------------GTAGA------TCCATTTTA---------------TCGGAAAAAACGGGGTATGAAAAGAAATCCAGTTTACTGATTGTGAAACG------------GGTAATTACTCGAATGTATC------AACAGAATCCTTTTATTATTT---TTCTTAATGATTCTCCC------CAAAATTTTATTTTGGGGCACAACAATA------ATTTTTATTCTCAACTCATATCAGAGGGGTTTGCATTTATTGTAGAAATTCCA…
	Penstemon_gracilis	ATGGAGGATATCCAAAGATATTTACAGCTCAAGAGATCT---CAACAACAC------AATTTCCTATATCCACTTATCTTTCAGGAGTATATTTATGCGTTTGCTCATGATCGTAG------TTTCA---------------GTAGA------TCCATTTTA---------------TCGGAAAAAACGGGGTATGAAAAGAAATCCAGTTTACTGATTGTGAAACG------------GGTAATTACTCGAATGTATC------AACAGAATCCTTTTATTATTT---TTCTTAATGATTCTACC------CAAAATAAATTTTTGGGGCACAACAATA------ATTTTTATTCTCAACTCATATCAGAGGGGTTTGCATTTATTGTAGAAATTCCA…
	Physalis_heterophylla	ATGGAAGAAATCCAAAGATATTTACAGCCAGATAGCTCG---CAACAACAC------AATTTCCTATATCCACTTATCTTTCAGGAGTATATTTATGCACTTGCTCATGATCATGG------TTTAA---------------ATAGAAATAGGTCGATTTTG---------------TTGGAAAATCCAGGTTATAACAATAAATTTAGTTTCCTAATTGTGAAACG------------TTTAATTACTCGAATGTATC------AACAGAATCATTTTATTATTT---CTACTAATGATTCTAAC------AAAAATCCATTTTTGGGGTGCAACAAGA------GTTTGTATTCTCAAATGATATCAGAGGGATTTGCATTTATTGTGGAAATTCCG…
	Physalis_virginiana	ATGGAAGAAATCCAAAGATATTTACAGCCAGATAGCTCG---CAACAACAC------AATTTCCTATATCCACTTATCTTTCAGGAGTATATTTATGCACTTGCTCATGATCATG------------------------------GAAATAGGTCGATTTTG---------------TTGGAAAATCCAGGTTATAACAATAAATTTAGTTTCCTAATTGTGAAACG------------TTTAATTACTCGAATGTATC------AACAGAATCATTTTATTATTT---CTACTAATGATTCTAAC------AAAAATCCATTTTTGGGGTGCAACAAGA------GTTTGTATTCTCAAATGATATCAGAGGGATTTGCATTCATTGTGGAAATTCCG…
	Plantago_patagonica	ATGGAGGAAATCCAAAGAGATTTACAGTTAGACAGATCT---CGACAGCAG------GACTTTCTATATCCACTTATTTTTCAGGAGTATATTTATGCATTTGCCCACGATCGTAG------TTTGA---------------GTCGA------TCCTTTTTGTCTGAAAATCAGGATTCGGAAAATCAGGTTTATGAAAATAAATCCAGTTTACTGATTGTGAAACG------------GTTAATTACTCAAATGTATA------AACAGAACCATTTTCTTATTT---CTACAAATGATTCGAAG------CAAAATGCATTGTTGGGCTGCAACAAGG------ATTTGTATTCTCAAATCCTATCAGAGGGTTTTACATTTATTGTGGAAATTCCA…
	Ratibida_columnifera	ATGGAGAAATTCCAAAGCTATTTAGGGCTAGATAGATCT---------CAC------TACTTCTTATATCCACTTATCTTTCAGGAGTATATTTATGTACTTGCTCATGATCATGG------TTTAA---------------ATGGA------TCTATTTTG---------------TTGGAAAATGCAGGTTATGACAATAAATCCAGTTTACTAATTGTGAAACG------------TTTAATCATTCGAATGTATC------AACAGAATCATTTGATTCTTT---CTGTTAATGATTCTAAA------CAGACTCCATTTTTGGGGCACAACAAGA------ATTTTTATTCGCAAGTAATGTCAGAGGTTTCTTCAACCATTATGGAAATTCCA…
	Rudbeckia_hirta_var_pulcherrima	ATGGAGAAATTCCAAAGCTATTTAGGGCTAGATAGATCT---------CAC------TACTTCTTATATCCACTTATCTTTCAGGAGTATATTTATGTACTTGCTCATGATCATGG------TTTAA---------------ATGGA------TCTATTTTG---------------TTGGAAAATGCAGGTTATGACAATAAATCCAGTTTACTAATTGTGAAACG------------TTTAATCATTCGAATGTATC------AACAGAATCATTTGATTCTTT---CTGTTAATGATTCTAAA------CAGACTCCATTTTTGGGGCACAACAAGA------ATTTTTATTCGCAAGTAATGTCAGAGGTTTCTTCAACCATTATTGAAATTCCA…
	Salvia_nemorosa	ATGGAGAAAATCCAAAGATATTTACAGCTAAAGAGATCT---CAACAACAC------GACTTCCTATACCCACTTCTATTTCAGGAGTATATTTATGTGTTTGCTCATAATCGTGC------TTTGA---------------ATAGA------TCTATTTTG---------------TCGGAAAATCCGGGTTATGACAATAAATCCAGTTTACGGATTGTGAAACG------------GTTAATTACTCGAATGTATC------ACNAGAATCATTTTATTATTT---CTTCTAATGATTCTAAC------AAAAATCCATTTTTGGCGCGAAACAATA------ATTTGTATTCTCAAATTATATCAGAGGGGTTTGCTTTTATTGTCGAAATTCCA…
	Senecio_integerrimus	ATGGATAAATCCCAAATCTATTTAGGGCTAGATAGATCT---CAACAACAC------TACTTCTTATATCCACTTATCTTTCAGGAGTATATTTATGTACTTGCTCATGATCATGG------TTTAA---------------ATAGA------TCTATTTTG---------------TTGGAAAATGCAGGTTATGACAATAAATGCAGCTTACTAATTGTGAAACG------------TTTAATCATTCGAATGTATC------AACAGAA---------CCTTT---TTGTTAATGATTCTAAA------CAGACTCCATTTGTGGGGCACAACAAAA------ATTTTTATTCGCAAGTAATGTCAGAGGTTTCTTCAATCATTATGGAAATTCCA…
	Silene_antirrhina	ATGGAAGAATTCCAAGGATATATAGAACTAGAAGGTTCT---TGGCAACAC------AACTTTTTCTATACACTTATCTTTCAGGAATATATTTTTTCGTTTGCATATGGTCATTA------TTTAA---------------ATAAA------TCTAATTTG---------------TTGGAAACTTCAGG---TAATAGGAAATATAGTTTACTAATTGTGAAACG------------TTTAATTACTCGAATGTATC------AACAGAATCATTTGATTCTTT---CGTCTAACGATTCTAAC------CAAAATGACTTTTGGGGGCACAAACGCA------ATTTTTATTCGCAAATGATATCAGAAGGATTTTCAGTCATTGTGGAAATTCCA…
	Silene_vulgaris	ATGGAAGAATTCCAAGGATATATAGAACTAGAGGGTTCT---TGGCAACAC------AACTTTTTTTATCCACTTATCTTTCAGGAATATATTTTTTCGTTTGCATATGGTCATGA------TTTAA---------------ATAAA------TCTATTTTG---------------TTGGAAACTTCAGG---TAATAGGAAATATAGTTTACTAATTGCGAAACG------------TTTAATTACTCGAATGTATC------AACATAATCATTTGATTCTTT---CGTCTAACGATTCTAAC------CAAAATGACTTTTGGGGGCACAAACGCA------ATTTTTATTCGCAAATGATATCAGAAGGATTTTCAGTTATTGTGGAAATTCCA…
	Silphium_integrifolum	ATGGAGAAATTCCAAAGCTATTTAGGGCTAGATAGATCT---------CAC------TACTTCTTATATCCACTTATCTTTCAGGAGTATATTTATGTACTTGCTCATGATCATGG------TTTAA---------------ATGGA------TCGATTTTG---------------TTGGAAAATGCAGGTTATGACAATAAATCCAGTTTACTAATTGTGAAACG------------TTTAATCATTCGAATGTATC------AACAGAATCATTTGATTCTTT---CTGTTAATGATTCTAAA------CATACTCCATTTTTGGGGCACAACAAGA------ATTTTTATTCGCAAGTAATGTCAGAGGTTTCTTCAACCATTATGGAAATTCCA…
	Solanum_carolinense	ATGGAAGAAATCCACAGATATTTACAGCCAGATAGCTCA---CAACCACAC------AACTTCCTATATCCACTTATCTTTCAGGAGTATATTTATGCACTTGCTCAGGATCATGG------TTTAA---------------ATAGAAATAGGTCGATTTTG---------------TTGGAAAATTCAGGTTATAACAATAAATTTAGTTTCCTAATTGTGAAACG------------TTTAATTACTCGAATGTATC------AACAGAATCATTTTCTTATTT---CTACTAATGATTCTAAC------AAAAATCCATTTTTGGGGTGCAACAAGA------GTTTGTATTCTCAAATGATATCAGAGGGATTTTCATGTATTGTGGAAATTCCG…
	Solanum_rostratum	ATGGAAGAAATCCACAGATATTTACAGCCAGATAGCTCA---CAACCACAC------AACTTCCTATATCCACTTATCTTTCAGGAGTATATTTATGCACTTGCTCAGGATCATGG------TTTAA---------------ATAGAAATAGGTCGATTTTG---------------TTGGAAAATTCAGGTTATAACAATAAATTTAGTTTCCTAATTGTGAAACG------------TTTAATTACTCGAATGTATC------AACAGAATCATTTTCTTATTT---CTACTAATGATTCTAAC------AAAAATCCATTTTTGGGGTGCAACAAGA------GTTTGTATTCTCAAATGATATCAGAGGGATTTGCATGTATTGTGGAAATTCCG…
	Solanum_triflorum	ATGGAAGAAATCCACAGATATTTACAGCCAGATAGCTCG---CAACAACAC------AACTTCCTATATCCACTTATCTTTCAGGAGTATATTTATGCACTTGCTCAGGATCATGG------TTTAA---------------ATAGAAATAGGTCGGTTTTG---------------TTGGAAAATTCAGGTTATAACAATAAATTTAGTTTCCTAATTGTAAAACG------------TTTAATTACTCGAATGTATC------AACAGAATCATTTTCTTATTT---CTACTAATGATTCTAAC------CAAAATCCATTTTTGGAGTGCAACAAGA------GTTTGTATTCTCAAATGATATCAGAGGGATTTGCATGTATTGTGGAAATTCCG…
	Solidago_gigantea	ATGGATAAATTCCAAAGCTATTTAGGGCTAGATAGATCT---CAACAACAC------TACTTCTTATATCCACTTATCTTTCAGGAGTATATTTATGTACTTGCTCATGATCATGG------TTTAA---------------ATAGA------TCAATTTTG---------------TTGGAAAATGCAGGTTATGACAATAAATCCAGCTTACTTATTGTAAAACG------------TTTAATCATTCGAATGTATG------AACAGAATCATTTGATTCTTT---CTGTTAATGACTCTAAA------CAGACTCCTTTTTTGGGGCAGACCAATC------ATTTTTATTCGCAAATAATGTCTGAGGTTTCTTCAATCATTATGGAAATTCCA…
	Solidago_missouriensis	ATGGATAAATTCCAAAGCTATTTAGGGCTAGATAGATCT---CAACAACAC------TACTTCTTATATCCACTTATCTTTCAGGAGTATATTTATGTACTTGCTCATGATCATGG------TTTAA---------------ATAGA------TCAATTTTG---------------TTGGAAAATGCAGGTTATGACAATAAATCCAGCTTACTTATTGTAAAACG------------TTTAATCATTCGAATGTATG------AACAGAATCATTTGATTCTTT---CTGTTAATGACTCTAAA------CAGACTCCTTTTTTGGGGCAGACCCATC------ATTTTTATTCGCAAATAATGTCTGAGGTTTCTTCAATCATTATGGAAATTCCA…
	Symphoricarpus_occidentalis	ATGGAGGAATTCAAAAGAGATTTCGAGCTAGATGGGTCT---CAACAACAC------TACTTCTTATATCCACTTATCTTTCAGGAGTATATTTATGCACTTGCTCATGATCATGG------TTTAA---------------ATAGA------GCGCATTTG---------------TTGGAAAATGTAGGGTATGACAATAAATCTAGCTTACTATTTGTGAAGCG------------TTTAATTACTCAAATGTATC------AAAAGAATCATTTGATTTTTT---CTGTTAAGGATTCTAAC------CAAAATGTATTTTTGGGGCGCAATAAGA------ATTTGTATTCTCAAATGATATCAGAGGGATTTGCAGTCATTGTAGAAATTCCA…
	Teucrium_canadense	ATGGAGGAAATCCAAAGATATTTACAGCTAGAGAAATCT---CAACAACAC------GACTTCTTATATCCACTTATCTTGCAGGAGTATATTTATGTATTTGCTCATAATTGTGC------TTTGA---------------GTAGA------TCGATTTTT---------------TCTGAAAATCCGGGTTATGACAGTAAATCAAGTTTACTGATTGTGAAACG------------ATTAATTACTCGAATGTATC------AACAGAATCATTTTCTTATTT---CTCCTAATGATTCTAAC------CAAAATCCATTTTGGGCGCGCAACAAGA------ATTTGTATTCTCAAATCATATCACACGGGTTTGCTTTTATTGTCGAAATTCCG…
	Thelesperma_filifolium	ATGGATAAATTCCAAAGCTATTTAGGGCTAGATAGATCT---------CAC------TACTTCTTATATCCACTTATCTTTCAGGAGTATATTTATGTACTTGCTCATGATCATGG------TTTAA---------------ATGGA------TCGATTTTG---------------TTGGAAAATACAGGTTATGACAATAAATCCAGTTTACTAATTGTGAAACG------------TTTAATCATTCGAATGTATC------AACAGAATCATTTGATTCTTT---ATGTTAATGATTCTAAA------CAGACTCCATTTTTGGGGCACAACAAGG------GTTTTTATTCGCAAGTAATGTCAGAGGTTTCTCCAACCATTATGGAAATTCCA…
	Tragopogon_dubius	ATGGAGAAATTCCAAAGCTATTTAGGGCTAGATAGATCT---CAACAACAC------TACTTCTTATATCCACTTATCTTTCAGGAGTATATTTATGTACTTGCTCATGATCATGG------TTTAA---------------ATAGA------TCGATTTTG---------------TTGGAAAATGCAGGTTATGACAATAAATCCAGCTTACTAATTGTGAAACG------------TTTAATAACGCGAATGTATC------AACAGAATCATTTGATTCTTT---CTGTTAATGATTCTAAA------CGGACTCCATTTTTGGGTCACAACAAGA------ATTTTGATTCGCAAGTAATGTCAGAGGTATCTTCAATCATTATGGAAATTCCA…
	Verbascum_thapsus	ATGGAGGAAATCCAAAGATATTTACAGCTAGAGAGATCTCAACAACAACAC------CACTTCCTATATCCACTTATCTTTCAGGAATATATTTATGTATTTGCTCATGATCGTGG------TTTCA---------------GTAGA------TCGATTTTG---------------TCGGAAAATCGGGGTTATGACAATAAATCTAGTTTCCTGCTTGTGAAACG------------GTTAATTACTCGAATGTATC------AACAGAATCATTTTATTATTT---TTTCTAATGATTCTAAC------CAAAATCTATTTTGGGGGCGCAACAAGA------ATTTGTATTCTCAAATCCTATCAGAGGGGTTTTCTTTTATTTTGGAAATTCCA…
	Verbena_hastata	ATGGAGGAAATCCAAAGATATTTACAACTAGAGAGATCT---GAACAACAC------GACTTCCTATATCCACTTATCTTTCAAGAGTATATTTATACATTTGCTCATGATCGTGG------TTTCA---------------GTAGA------TCTATTTTG---------------TCGGAAAATCGGGGTTATGAAAATAAATCCAGTTTACTGATTGTGAAACG------------GTTAATTAATCGAATGGATC------AAGAGAACCGTTTTCTTATTT---CTCCTAATTATTCAAAC------CAAAATCCATTTTGGGCGTGCAACAAGA------ATTTCTATTCTCAAATTCTATCAGAGGGGTTTGCTTTTATTGTGGAAATTCCA…
	Vernonia_baldwinii	ATGGAGAAATTCCAAAGTTATTTAGGGCTAGATAGATCT---CAACAACAC------TACTTCTTATATCCACTTATCTTTCAGGAGTATATTTATGTACTTGCTCATGATCATGG------TTTAA---------------ATAGA------TCGATTTTG---------------TTGGAAAATGCAGGTTATGACAATAAATCCAGCTTACTAATTGTGAAACG------------TTTAATCATTCGAATGTATC------AACAGAATCATTTGATTCTTT---CTGTTAATGATTCTAAA------CAGACTCCATTTTTGGGGCACAACAATC------ATTTTTATTCGCAAGTAATCTCAGAGATATCTTCAATCATTATGGAAATTCCA…
	Veronica_americana	ATGGAGGAAATCCAAAGATATTTACAGCTAGAGAGATCT---CAACAACAC------GACTTTCTATATCCACTTATCTTTCAGGAGTATATTTATGCATTTGCTCATGATCGTAC------TTTCA---------------GTAGA------TATATTTTGTCGGAAAATAGGGATTCGGAAAATTCGGATTCTCAGAAAAAATATAGTTTACTGATTGTGAAACG------------GTTAATTACTCGAATGTATC------AACAGAATCATTTTTTAATTT---CTCCTAATGATTCTAAC------CAAAATCTATTTTGTGGTCGAAACAAGA------ATTTGTATTATCAAATCCTAGCAGAGGGGTTTGCGTTTATTGTGGAAATTCCA…
	Xanthisma_spinulosum	ATGGATAAATTCCAAAGCTATTTAGGGCTAGATAGATCT---CAACAACAC------TACTTCTTATATCCACTTATCTTTCAGGAGTATATTTATGTACTTGCTCATGATCATGG------TTTAA---------------ATAGA------TCAATTTTG---------------TTGGAAAATGCAGGTTATGACAATAAATCCAGCTTACTTATTGTGAAACG------------TTTAATCATTCGAATGTATG------AACAGAATCATTTGATTCTTT---CTGTTAATGACTCTAAA------CAGACTCCTTTTTTGGGGCAGACCAATC------ATTTTTATTCGCAAATAATGTCAGAGGTTTCTTCAATCATTATGGAAATTCCA…
	Zizia_aurea	ATGGAAGAATTCCAAAGATATTTAAAGCTAAATAGATCT---CAACAACAC------TACTTCTTATATCCACTTATCTTTCAGGAGTATATTTATGCACTTGCGCATGATCATGG------TTTAAATAGAA---------ATAGA------TCCGTTTTG---------------TTGGAAAATGCAGGTTCT---AAAAAGTTCAGCTTACTAATTGTGAAACG------------TGCAATTGAGCGAATGTATCAATATGAACAGAATCATTTGATTCTTT---TTGCTAATGATTTTACC------CAAAATACCTTTTTTGGGCTCAACAAAA------ATTTTAATTTTCAAATGATATCAGAAGGATTTGCAGTCATTGTAGAAATTCCG…
;
end;
