# Supplementary material for: Biodiversity assessment among two Nebraska prairies: a comparison between traditional and phylogenetic diversity indices
Source: Biodivers Data J. 2015 Jul 17;(3):e5403. doi: 10.3897/BDJ.3.e5403 (PMC4549632; doi:10.3897/BDJ.3.e5403)
Supplement: Supplementary material 9 — rbcL + matK Nexus file [file biodiversity_data_journal-3-e5403-s009.nex]

#NEXUS
begin taxa;
	dimensions ntax=65;
	taxlabels
	Achillea_millefolium
	Androsace_occidentalis
	Antennaria_howellii_subsp_neodica
	Antennaria_neglecta
	Asclepias_syriaca
	Asclepias_verticillata
	Campanula_rotundifolia
	Carduus_nutans
	Cicuta_maculata
	Cirsium_canescens
	Cirsium_undulatum
	Comandra_umbellata
	Conium_maculatum
	Convolvulus_arvensis
	Echinacea_angustifolia
	Ellisia_nyctelea
	Erigeron_bellidiastrum
	Erigeron_philadelphicus
	Erigeron_strigosus
	Evolvulus_nuttallianus
	Galium_aparine
	Grindelia_squarrosa_var_squarrosa
	Gutierrezia_sarothrae
	Helianthus_annuus
	Helianthus_pauciflorus_subsp_subrhomboideus
	Helianthus_petiolaris
	Helianthus_tuberosus
	Heliopsis_helianthoides_var_occidentalis
	Heterotheca__stenophylla_var_stenophylla
	Heterotheca__villosa
	Hymenopappus_tenuifolius
	Imaptiens_capensis
	Ipomoea_leptophylla
	Lactuca_ludoviciana
	Liatris_glabrata
	Lygodesmia_juncea
	Monarda_fistulosa_var_mollis
	Nepeta_cataria
	Penstemon_angustifolius
	Penstemon_gracilis
	Physalis_heterophylla
	Physalis_virginiana
	Plantago_patagonica
	Ratibida_columnifera
	Rudbeckia_hirta_var_pulcherrima
	Salvia_nemorosa
	Senecio_integerrimus
	Silene_antirrhina
	Silene_vulgaris
	Silphium_integrifolum
	Solanum_carolinense
	Solanum_rostratum
	Solanum_triflorum
	Solidago_gigantea
	Solidago_missouriensis
	Symphoricarpus_occidentalis
	Teucrium_canadense
	Thelesperma_filifolium
	Tragopogon_dubius
	Verbascum_thapsus
	Verbena_hastata
	Vernonia_baldwinii
	Veronica_americana
	Xanthisma_spinulosum
	Zizia_aurea
;
end;
begin characters;
	dimensions nchar=3204;
	format datatype=dna missing=? gap=-;
	matrix
	Achillea_millefolium	ATGGAGAAATTCCAAAGCTATTTAGGGCTAGATAGATCT---CAACAACACT------CTTTCTTATATCCACTTATCTTTCAGGAGTATATTTATGTACTTGCTCATGATCATGGTTT------AA---------ATAGATCTATTTTG------TTGGAAAATGTAGGTTATGACAAT---------------AAATTCAGCTTACTAATTGTGAAACG------------TTTAATCATTCGAATGTATC------AACAGAATCATTTTATTCTTT---CTGTTAATGATTCTAAA------CA------ATTGTTGGGGCACAACAATA------TTTTTTATTCGCAAGTAATGTCAGAGGTTTCTTCAATCATTCTGGAAATTCCACTGTCT…
	Androsace_occidentalis	ATGGAGGAATTCAAAAGATATTTAGAACTAAATAGATCT---CAGCAGCGTG------ACTTCCTGCATCCGCTTCTATTTCAGGAGTATATTTATGCACTTGCTCATGATCACAGTTT------AA---------CTAGATCCATTTCGTTGGAATTGGAAAAGGTAGGTTATGAGAAT---------------AACTTCAGCTTACTAATTGCGAAACGTTTAATTACTCATTTAATTACTCAAATGGATC------GACAGAATCCGTTGAGTTTTT---TGACTAATGATTCGAACCAAAATCAAAATCCATTTTTGGGGCACAACACAC------TTTTGTATTCTCAAATTATATTAGAAGGATTTGTAGTCGTTGTGGAAATTCCCTTTTCT…
	Antennaria_howellii_subsp_neodica	ATGGAGAAATTCCAAAGCTATTTAGGGCTAGATAGATCT---CAACAACACT------ACTTCTTATATCCACTTATCTTTCAGGAGTATATTTATGTACTTGCTCATGATTATGGTTT------AA---------ATAGATCCATTTTG------TTGGAAAATTCAGGTTATGACAAT---------------AAATCCAGCTTACTAATTGTGAAACG------------TTTAATCATTCGAATGTATC------AACAGAATAATTTGATTCTTT---CTGTTAATGATTCTAAA------CAGACTCCTTTTTTCGGGAACAACAAGA------ATTTTTATTCGCAAGTAATGTCAGAGGTTTCTTCAATTATTATGGAAATTCCATTGTCT…
	Antennaria_neglecta	ATGGAGAAATTCCAAAGCTATTTAGGGCTAGATAGATCT---CAACAACACT------ACTTCTTATATCCACTTATCTTTCAGGAGTATATTTATGTACTTGCTCATGATTATGGTTT------AA---------ATAGATCCATTTTG------TTGGAAAATTCAGGTTATGACAAT---------------AAATCCAGCTTACTAATTGTGAAACG------------TTTAATCATTCGAATGTATC------AACAGAATAATTTGATTCTTT---CTGTTAATGATTCTAAA------CAGACTCCTTTTTTCGGGAACAACAAGA------ATTTTTATTCGCAAGTAATGTCAGAGGTTTCTTCAATTATTATGGAAATTCCATTGTCT…
	Asclepias_syriaca	ATGGAAGAAATCCAAAGATATTTACAGCTTGATAGATCT---CAACAACCCA------ACTTTCTATATCCACTTATCTTTCAGGAATATATTTATGCACTTGCTCATGACCATAGTTT------AA---------ACCGAGCTATTTTG------TTGGAAAATCCGGGTTATGACAAT---------------AAATCGAGTTTCCTTATTGTGAAACG------------ATTAATTATTCTAATGTATC------AACAGAATCATTTTCTTACTT---CTATTAATGATTCTAAC------CAAAATCCATTTTTTGGCCGCAACAAAA------ATTTGTATTCTAAAATGATATCAGAGGGATTTTCATTTATTGTGGAAATTCCATTTTCT…
	Asclepias_verticillata	ATGGAAGAAATCCAAAGATATTTACAGCTTGATAGATCT---CAACAACCCA------ACTTTCTATATCCACTTATCTTTCAGGAATATATTTATGCACTTGCCCATGACCATAGTTT------AA---------ACCGAGCTAGTTTG------TTGGAAAATCCGGGTTATGACAAT---------------AAATCGAGTTTCCTTATTGTGAAACG------------ATTAATTATTCTAATGTATC------AACAGAATCATTTTCTTACTT---CTATTAATGATTCTAAC------CAAAATCCATTTTTTGGGCGCAACACAA------ATTTGTATTCTAAAATGATATCAGAGGGATTTTCATTTATTGTGGAAATTCCATTTTCT…
	Campanula_rotundifolia	ATGGAAGAATTTCAAAGCGCTTTAGAGTTCGATAGATTT---CAACAACATG------ACTTCTTATATCCACTTATCTTTCAGGAGTATATTTATGCACTTGCTCATGATCATGGTTT------AA---------ATGGATCCATTTTG------TTGAAAAATGTAGGTTATGGCAAT---------------AAATTCAGCTTACTAATTGTGAAACG------------GTTAATTCTTCGAATGTATG------ACCAGAATTATTTGATTCATT---CTACGAATGATTGTAAA------CAAAAGCCATTTTGGGGGCGCAGCAAGA------ATTTTGAGTCTCAAATCATATCAGAAGCATTTTCGGTCATTCTGGAAATTCCATTTTCT…
	Carduus_nutans	ATGGAGAAATTCCAAAGCTATTTAGGGCTAGATAGATCT---CAACAACACT------ACTTCTTATATCCACTTATCTTTCAGGAGTATATTTATGTACTTGCTCATGATCATGGTTT------AA---------ATAGATCGATTTTG------TTGGAAAATGCAGGTTATGACAAT---------------AAATCCAGCTTACTAATTGTGAAACG------------TTTAATCACTCGAATGTATC------AACAGAATCATTTGATTCTTT---CCGTTAATGATTCTAAA------CAGACTCCATTTTTGGGCCACAACAAGA------ATTTTTATTCGCAAGTAATGTCAGAGGTATCTTCAATCATTATGGAAATTCCATTGTCT…
	Cicuta_maculata	ATGGAGGAATTTCAAAGATATTTAAAGCTAAATAGATAT---CAACAACACT------ATTTCTTATATCCACTTATCTTTCAGGAATATATTTATGCACTTGCGCATGATCATGGTTTAAATAGAATAAATAGAGATAGATCTATTTTG------TTGGAAAATGCAGGTTCT---AAT---------------AAATTCAGCTTACTAATTGTGAAACG------------TGCAATTGAGCGAATGTATCAGTATGAACAGAATCATTTGATTCTTT---TTGCTAATGATTTTAAC------CAAAATATATTTTTTGGACGCAACAAGA------ATTTTAATTTTCAAATGATATCAGAAGGATTTGCAGTCATTGTAGAAATTCCGTTTTAT…
	Cirsium_canescens	ATGGAGAAATTCCAAAGCTATTTAGGGCTAGATAGATCT---CAACAACACT------ACTTCTTATATCCACTTATCTTTCAGGAGTATATTTATGTACTTGCTCATGATCATGGTTT------AA---------ATAGATCGATTTTG------TTGGAAAATGCAGGTTATGACAAT---------------AAATCCAGCTTACTAATTGTGAAACG------------TTTAATCACTCGAATGTATC------AACAGAATCATTTGATTCTTT---CCGTTAATGATTCTAAA------CAGACTCCATTTTTGGGGCACAACAAGA------ATTTTTATTCGCAAGTAATGTCAGAGGTATCTTCAATCATTATGGAAATTCCATTGTCT…
	Cirsium_undulatum	ATGGAGAAATTCCAAAGCTATTTAGGGCTAGATAGATCT---CAACAACACT------ACTTCTTATATCCACTTATCTTTCAGGAGTATATTTATGTACTTGCTCATGATCATGGTTT------AA---------ATA---------TG------TTGGAAAATGCAGGTTATGACAAT---------------AAATCCAGCTTACTAATTGTGAAACG------------TTTAATCACTCGAATGTATC------AACAGAATCATTTGATTCTTT---CCGTTAATGATTCTAAA------CAGACTCCATTTTTGGGGCACAACAAGA------ATTTTTATTCGCAAGTAATGTCAGAGGTATCTTCAATCATTATGGAAATTCCATTGTCT…
	Comandra_umbellata	ATGGAGAAATTCCAAAGATATTTAGAACGAAATAGATCT---CGACAACATGACTTGAACTTTTTATATCCACTGATGTTTCAAGAGTATATTTATTCACTTACTTATGATCGTGGTTT------AA---------CTAGATCAATTATA------TTAGAAAATGTGGGTTATGAAAAA---------------AAATTCAGTTTACTAATTGTCAAACG------------TTTAATTACTCGAATGTATC------AACAAAATCGTTTTATTATTT---CCGCTAATGATTCTAAT------CCAAATCTATTTTTGGGGCATAATAAAG------ATTTTTATTTGCAAATGATACCAGAGGGATTTACAGTCATTGTGGAAATTCCATTTTCC…
	Conium_maculatum	ATGGAGGAATTGCAAAGATATTTAAAGCTAAATAGATCT---CAACAACACT------ACTTCTTATATCCACTTATCTTTGAGGAGTATATTTATGCACTTGCGCATGATCATGGTTTAAATATAA---------ATAGATCCATTTTG------TTGGAAAATGCGGGTTCT---AAT---------------AAATTCAGCTTACTCATTGTGAAACG------------TGCAATTGAGCGAATGTATCAGTATGAACAGAATCATTTGATTCTTT---TTGCTAATGATTTTAAC------CAAAATCCATTTTTTGGGCGCAACAATA------ATTTTAATTTTCAAATGATATCAGAAGGATTTGCAGTCATTGTAGAAATTCCGTTTTAT…
	Convolvulus_arvensis	ATGGAGGAAATTCAAAGATATTTACAGCCAGAAAGATCT---CAACAACACA------ACTTCCTATATCCACTTCTCTTTCAGGAGTCTATTTATGCACTTGCTCATGATCGTGGTTT------AA---------ATAGGTCAATTTTT------TTTAAAAATACGGGGTATGAAAAA---------------AAATTGAGTTTTCAAATTGTGAAACG------------CTTAATTATTCGAATTTATC------AACAAATATATTTTAGTACTT---------ATTCTTCTAAT------AAAAGTCAAATTTTTGGGCCCAACAATA------GTTTGTATTCTAAACTGCTATCAGAGGGGTTTGCTTTTATTGTGGAAATTCCGTTTTCT…
	Echinacea_angustifolia	ATGGAGAAATTCCAAAGCTATTTAGGGCTAGATAGATCT---------CACT------ACTTCTTATATCCACTTATCTTTCAGGAGTATATTTATGTACTTGCTCATGATCATGGTTT------AA---------ATGGATCAATTTTG------TTGGAAAATGCAGGTTATGACAAT---------------AAATCCAGTTTACTAATTGTGAAACG------------TTTAATCATTCGAATGTATC------AACAGAATCATTTGATCCTTT---CTGTTAATGATTCTAAA------CAGACTCCTTTTTTGGGGCACAACAAGA------ATTTTTATTCGCAAGTAATGTCAGAGGTTTCTTCAACCATTATGGAAATTCCATTGTCT…
	Ellisia_nyctelea	ATGGAGGAAATTCAAAGATATTTACAGCTAGATAGATCT---CAACAACACG------ACTGCCTATATCCACTTATCTTTCAGGAGTATATTTATGCACTTGCTCATGATCATGGATT------AA---------ATAGATTGATTTTG------TTAGAAAATTCCGGTTATGACAAT---------------AAATCCAGTTTACTTATTGTGAAACG------------TTTAATTACTCAAATGTATC------AACAGAATCATTTTTTGATTT---CTCTTAATGATTTTAAC------CAAAATCTATTTTTGGGGCGCAACAATC------ATTTGTATTCTCAAATGATATCAGAGGTATTTGCATTTATTGTTGAAATGCCGTTTTCT…
	Erigeron_bellidiastrum	ATGGATAAATTCCAAAGCTATTTAGGGCTAGATAGATCT---CAACAACACT------ACTTCTTATATCCACTTATCTTTCAGGAGTATATTTATGTACTTGCTCATGATCATGGTTT------AA---------ATAGATCCATTTTG------TTGGAAAATGCAGGTTATGACAAT---------------AAATCCAGCTTACTTCTTGTGAAACG------------TTTAATCATTCGAATGTATG------AACAGAATCATTTGATTCTTT---CTGTTAATGACTCTAAA------CAGACTCCTTTTTTGGGGCAGACCCCTC------TTTTTTATTCGCAAATAATGTCAGAGGTTTCTTCAATCATTATGGAAATTCCATTGTCT…
	Erigeron_philadelphicus	ATGGATAAATTCCAAAGCTATTTAGGGCTAGATAGATCT---CAACAACACT------ACTTCTTATATCCACTTATCTTTCAGGAGTATATTTATGTACTTGCTCATGATCATGGTTT------AA---------ATAGATCCATTTTG------TTGGAAAATGCAGGTTATGACAAT---------------AAATCCAGCTTACTTCTTGTGAAACG------------TTTAATCATTCGAATGTATG------AACAGAATCATTTGATTCTTT---CTGTTAATGACTCTAAA------CAGACTCCTTTTTTGGGGCAGACCCTTC------TTTTTTATTCGCAAATAATGTCAGAGGTTTCTTCAATCATTATGGAAATTCCATTGTCT…
	Erigeron_strigosus	ATGGATAAATTCCAAAGCTATTTAGGGCTAGATAGATCT---CAACAACACT------ACTTCTTATATCCACTTATCTTTCAGGAGTATATTTATGTACTTGCTCATGATCATGGTTT------AA---------ATAGATCCATTTTG------TTGGAAAATGCAGGTTATGACAAT---------------AAATCCAGCTTACTTCTTGTGAAACG------------TTTAATCATTCGAATGTATG------AACAGAATCATTTGATTCTTT---CTGTTAATGACTCTAAA------CAGACTCCTTTTTTGGGGCAGACCCCTC------TTTTTTATTCGCAAATAATGTCAGAGGTTTCTTCAATCATTATGGAAATTCCATTGTCT…
	Evolvulus_nuttallianus	ATGGAGGAAATTCAAATAGATTTACAGCCAGAGAGATCT---CAACAACACA------ACTTCCTATATCCACTTCTCTTTCAGGAGTATATTTATGCACTTGCTCATGATTGTGGTTTAAATTTAA---------ATAGGTCAATTTAT------TTTGAAAATACAGGGTATGAAAAC---------------AAATTGAGTTTTCAAATTGTGAAACG------------CTTAATTACTCGAATGTATC------AACAGATACATTTTACTACTTATTCGTCTAATTCGTCTAAC------AAAAGTCAAATTTTTGGTCCCAACAAGA------ATTTGTATTCTAAACTGCTATCAGAGGGGTTTGCTTTTATTGTGGAAATTCCGTTTTCT…
	Galium_aparine	ATGGAGCAAATCAAAAGATATTTACAGCTTGATAGATCT---CAACAGTACG------TCTTTCTATATCCACTTATCTTTCAGGAGTATATTTACGGACTTGCTCATGGTTGTAGTTT------AA---------GCCGATCTCGTTTG------TTGGAAAATCGAGGTTATGATAAT---------------AACTACAGTTTCCTACTTGTTAAACG------------TTTAATTACTCGATTGTATC------GACAAAATGTTTTTATTATTT---TTGCTAATGATTCTAAT------AAAAATTTATTTTTTGGTTGCAACAGGA------ATTTCTACCCTCAAACGATATCAGAAGGGTTTGCATTTATTGTGGAAATTCCATTTGAT…
	Grindelia_squarrosa_var_squarrosa	ATGGATAAATTCCAAAGCTATTTAGGGCTAGATAGATCT---CAACAACACT------ACTTCTTATATCCACTTATCTTTCAGGAGTATATTTATGTACTTGCTCATGATCATGGTTT------AA---------ATAGATCAATTTTG------TTGGAAAATGCAGGTTATGACAAT---------------AAATCCAGCTTACTTATTGTGAAACG------------TTTAATCATTCGAATGTATG------AACAGAATCATTTGATTCTTT---CTGTTAATGACTCTAAA------CAGACTCCTTTTTTGGGGCAGATCAATC------ATTTTTATTCGCAAATAATGTCAGAGGTTTCTTCAATCATTATGGAAATTCCATTGTCT…
	Gutierrezia_sarothrae	ATGGATAAATTCCAAAGCTATTTAGGGCTAGATAGATCT---CAACAACACT------ACTTCTTATATCCACTTATCTTTCAGGAGTATATTTATGTACTTGCTCATGATCATGGTTT------AA---------ATAGATCAATTTTA------TTGGAAAATGCAGGTTATGACAAT---------------AAATCCAGCTTACTTATTGTAAAACG------------TTTAATCATTCGAATGTATG------AACAGAATCATTTGATTCTTT---CTGTTAATGACTCTAAA------CAGCCTCCTTCTTTGGGGCAGACCAATC------ATTTTTATTCGCAAATAATGTCAGAGGTTTCTTCAATCATTATGGAAATTCCATTGTCT…
	Helianthus_annuus	ATGGAGAAATTCCAAAG---------GCTAGATAGATCT---------CACT------ACTTCTTATATCCACTTATCTTTCAGGAGTATATTTATGTACTTGCTCATGATCATGGTTT------AA---------ATGGATCGATTTTG------TTGGAAAATGCAGGTTATGACAAT---------------AAATCCAGTTTACTAATTGTGAAACG------------TTTAATCATTCGAATGTATC------AACAGAATCATTTGATTCTTT---CTGTTAATGATTCTAAA------CAGACTGCATTTTTGGGGCACAACAAGA------ATTTTTATTCGCAAGTAATGTCAGAGGTTTCTTCAACCATTATGGAAATTCCATTGTCT…
	Helianthus_pauciflorus_subsp_subrhomboideus	ATGGAGAAATTCCAAAG---------GCTAGATAGATCT---------CACT------ACTTCTTATATCCACTTATCTTTCAGGAGTATATTTATGTACTTGCTCATGATCATGGTTT------AA---------ATGGATCGATTTTG------TTGGAAAATGCAGGTTATGACAAT---------------AAATCCAGTTTACTAATTGTGAAACG------------TTTAATCATTCGAATGTATC------AACAGAATCATTTGATTCTTT---CTGTTAATGATTCTAAA------CAGACTGCATTTTTGGGGCACAACAAGA------ATTTTTATTCGCAAGTAATGTCAGAGGTTTCTTCAACCATTATGGAAATTCCATTGTCT…
	Helianthus_petiolaris	ATGGAGAAATTCCAAAG---------GCTAGATAGATCT---------CACT------ACTTCTTATATCCACTTATCTTTCAGGAGTATATTTATGTACTTGCTCATGATCATGGTTT------AA---------ATGGATCGATTTTG------TTGGAAAATGCAGGTTATGACAAT---------------AAATCCAGTTTACTAATTGTGAAACG------------TTTAATCATTCGAATGTATC------AACAGAATCATTTGATTCTTT---CTGTTAATGATTCTAAA------CAGACTGCATTTTTGGGGCACAACAAGA------ATTTTTATTCGCAAGTAATGTCAGAGGTTTCTTCAACCATTATGGAAATTCCATTGTCT…
	Helianthus_tuberosus	ATGGAGAAATTCCAAAG---------GCTAGATAGATCT---------CACT------ACTTCTTATATCCACTTATCTTTCAGGAGTATATTTATGTACTTGCTCATGATCGTGGTTT------AA---------ATGGATCGATTTTG------TTGGAAAATGCAGGTTATGACAAT---------------AAATCCAGTTTACTAATTGTGAAACG------------TTTAATCATTCGAATGTATC------AACAGAATCATTTGATTCTTT---CTGTTAATGATTCTAAA------CAGACTGCATTTTTGGGGCACAACAAGA------ATTTTTATTCGCAAGTAATGTCAGAGGTTTCTTCAACCATTATGGAAATTCCATTGTCT…
	Heliopsis_helianthoides_var_occidentalis	ATGGATAAATTCCAAAGCTATTTAGGGCTAGATAGATCT---------CACT------ACTTCTTATATCCACTTATTTTTCAGGAGTATATTTATGTACTTGCTCATGATCATGGTTT------AA---------ATGGATCAACTTTG------TTGGAAAATGCAGGTTATGAAAAT---------------AAATCCAGTTTACTAATTGTGAAACG------------TTTAATCATTCGAATGTATC------AACAGAATCATTTGATCCTTT---TTGTTAATGATTCTAAA------CAGACTCCGTTTTTGGGGCACAACAAGA------ATTTTTATTCGCAAGTAATGTCAGAGGTTTCTTCAACCATTATGGAAATTCCATTGTCT…
	Heterotheca__stenophylla_var_stenophylla	ATGGATAAATTCCAAAGCTATTTAGGGCTAGATAGATCT---CAACAACACT------ACTTCTTATATCCACTTATCTTTCAGGAGTATATTTATGTACTAGCTCATGATCATGGTTT------AA---------ATAGATCAATTTTG------TTGGAAAATGCCGGTTATGACAAT---------------AAATCCAGCTTACTTATTGTGAAACG------------TTTAATCATTCGAATGTATG------AACAGAATCATTTGATTCTTT---CTGTTAATGACTCTAAA------CAGACTCCTTTTTTGGGGCAGACCAATC------ATTTTTATTCGCAAATAATGTCAGAGGTTTCTTCAATCATTATGGAAATTCCATTGTCT…
	Heterotheca__villosa	ATGGATAAATTCCAAAGCTATTTAGGGCTAGATAGATCT---CAACAACACT------ACTTCTTATATCCACTTATCTTTCAGGAGTATATTTATGTACTAGCTCATGATCATGGTTT------AA---------ATAGATCAATTTTG------TTGGAAAATGCCGGTTATGACAAT---------------AAATCCAGCTTACTTATTGTGAAACG------------TTTAATCATTCGAATGTATG------AACAGAATCATTTGATTCTTT---CTGTTAATGACTCTAAA------CAGACTCCTTTTTTGGGGCAGACCAATC------ATTTTTATTCGCAAATAATGTCAGAGGTTTCTTCAATCATTATGGAAATTCCATTGTCT…
	Hymenopappus_tenuifolius	ATGGAGAAATTCCAAAGCTATTTAGGGCTAGATAGATCT---------CACT------ACTTCTTATATCCACTTATCTTTCAGGAGTATATTTATGTACTTGCTCATGATCATGGTTT------AA---------ATGGATCGATTTTG------TTGGAAAATGCAGGTTATGACAAT---------------AAATCCAGTTTACTAATTGTGAAACG------------TTTAATCGTTCGAATGTATC------AACAGAATCATTTGATTCTTT---CTGTTAATGATTCTAAA------CAGACTCCATTTTTGGGGCACTACAATC------ATTTTTATTCGCAAGTAATGTCAGAGGTTTCTTCAACCATTATGGAAATTCCATTGTCT…
	Imaptiens_capensis	ATGGAGGAGTTCAAAAGATATTTAGAACTAGATAGATCT---CAGCAACAGG------GCTTCCTATATTCATTTAGCTTTCAAGAGTCTATTTATACACTTGCTCATGT---------------AA---------ATAGATCAATTTTA------------AATGCGGATTCTGACAAA---------------AAATCTAGCTTACTAATTGTGAAATC------------TTTAATTACTCAAATGTATC------AACAAAATCATTTGATTTTTT---CTGCTAATGATCCTAAA------CAAAATTTATTTTTTGGACACAACACGG------ATTTATATTGTCAAATCCTATTCGAAGCATTTGCCGTCGTTTTGGAAATTCCATTTTTT…
	Ipomoea_leptophylla	ATGGAGGAAATTCAAAGATATTTACAGCCAGAGAGATCT---CAACAACACA------ACTTCCTATATCCACTTCTCTTTCAGGAGTCTATTTATGCACTTGCTCATGATCGTGGTTT------AA---------ATAGGTCGATTTCT------TTTAAAAATACCGGGTATGAAAAA---------------AAATTGAGTTTTCAAATTGTGAAACG------------CTTAATTACTCGAATTTATC------AACAGATCTATTTTACTACTT---------ATTCTTATAAC------AAAAGTCAAATTTTTGGGCCCAACAAGA------GTTTGTATTCTAAACTGCTATCAGAGGGGTTTGCTTTTATTGTGGAAATTCCGTTTTCT…
	Lactuca_ludoviciana	ATGGAGAAATTCCAAAGCTATTTAGGGCTAGATAGATCT---CAACAACACC------ACTTCTTATATCCACTTATCTTTCAGGAGTATATTTATGTACTTGCTCATGATCATGGTTT------AA---------CTAGATCGATTTTG------TTGGAAAATGCAGGTTATGACAAT---------------AAATCCAGCTTACTAATTGTGAAACG------------TTTAATCAATCGAATGTATC------AACAGAATCATTTGATTCTTT---CGGTTAATAATTCTAAA------CAGACTCCATTTTTGGGGCACAACAAGA------ATTTTTATTCGCAAGTAATGTCAGAGGTATCTTCAATCATTATGGAAATTCCATTGTCT…
	Liatris_glabrata	ATGGAGAAATTCCAAAGCTATTTAGGGATAGATAGATCT---------CACT------ACTTCTTATATCCACTTATCTTTCAGGAGTATATTTATGTACTTGCTCATGATCATGGTTT------AA---------ATGGATCGATTTTG------TTGGAAAATGCAGATTATGACAAT---------------AAATCCAGTTTACTAATTGTGAAACG------------TTTAATCATTCGAATGTATC------AACAGAATCATTTGATTCTTT---CTATTAATGATTCTAAA------CAGATTCCATTTTTGGGGCACAACAAGAATTTTTATTTTTATTCGCAAGTAATGTCAGAGGTTTCTTCAACCATTATGGAAATTCCATTGTCT…
	Lygodesmia_juncea	ATGGAGAAATTCCAAAGCTATTTAGGGCTAGATAGATCT---CAACAACACT------ACTTCTTATATCCACTTATCTTTCAGGAGTATATTTATGTACTTGCTCATGATCATGGTTT------AA---------ATAGATCGATTTTG------TTGGAAAATGCAGGTTATGACAAT---------------AAATACAGCTTACTGATTGTGAAACG------------TTTAATCACTCGAATGTATC------AACAGAATCATTTGATTCTTT---CGGTTAATAATTCTAAA------CAGACTCCATTTTGGGGGCACAACAAGA------ATTTTTATTCGCAAGTAATCTCAGAGGTATCTTCAATCATTATGGAAATTCCATTGTCT…
	Monarda_fistulosa_var_mollis	ATGGAGAAAATCCAAAGATATTTACAGCTAAAGAGATCT---CAACAACACG------ACTTCCTATATCCACTTATATTTCAGGAGTATATTTATGTGTTTGCTCATAATCGTGCTTT------GA---------ATAGATCTATTTTG------TCGGAAAATCCGGGTTATGACAAT---------------AAATCCAGTTTACGGATTGTGAAACG------------ATTAATTACTCGAATGTATC------AACAGAATCCTTTTCTTTTTT---CTTCTAATGATTCTAAC------AAAAATCCATTTTTGGCGCGCAACAAGA------ACTTGTATTCTCAAATTATATCAGAGGGGTTTGCTTTTATTGTAGAAATTCCATTTTGT…
	Nepeta_cataria	ATGGAGAAAATCCAAAAATATTTACAGCTAAAGAGATCT---CAACAACACG------ACTTTTTATATCCACTTATATTTCAGGAATATATTTATGTGTTTGCTCATAATCGTGCTTT------GA---------ATAGATCTATTTTG------TCGGAAAATCCGGGTTATGACAAT---------------AAGTCCAGTTTACGGATTGTGAAACG------------ATTAATTACTCGAATGTATC------AACAGAATCATTTTATTATTT---CTTCGAATAATTCGAAC------AAAAATCTATTTTTGGCGCGCAACAAGA------ACTTGTATTCTCAAATTATATCAGAGGGGTTTGCTTTTATTGTAGAAATTCCATTTTTT…
	Penstemon_angustifolius	ATGGAGGAAATCCAAAGATATTTACAGCTCAAGAGATCT---CAACAACACA------ATTTCCTATATCCACTTATCTTTCAGGAGTATATTTATGCGTTTGCTCATGATCGTAGTTT------CA---------GTAGATCCATTTTA------TCGGAAAAAACGGGGTATGAAAAG---------------AAATCCAGTTTACTGATTGTGAAACG------------GGTAATTACTCGAATGTATC------AACAGAATCCTTTTATTATTT---TTCTTAATGATTCTCCC------CAAAATTTTATTTTGGGGCACAACAATA------ATTTTTATTCTCAACTCATATCAGAGGGGTTTGCATTTATTGTAGAAATTCCATTTTTT…
	Penstemon_gracilis	ATGGAGGATATCCAAAGATATTTACAGCTCAAGAGATCT---CAACAACACA------ATTTCCTATATCCACTTATCTTTCAGGAGTATATTTATGCGTTTGCTCATGATCGTAGTTT------CA---------GTAGATCCATTTTA------TCGGAAAAAACGGGGTATGAAAAG---------------AAATCCAGTTTACTGATTGTGAAACG------------GGTAATTACTCGAATGTATC------AACAGAATCCTTTTATTATTT---TTCTTAATGATTCTACC------CAAAATAAATTTTTGGGGCACAACAATA------ATTTTTATTCTCAACTCATATCAGAGGGGTTTGCATTTATTGTAGAAATTCCATTTTTT…
	Physalis_heterophylla	ATGGAAGAAATCCAAAGATATTTACAGCCAGATAGCTCG---CAACAACACA------ATTTCCTATATCCACTTATCTTTCAGGAGTATATTTATGCACTTGCTCATGATCATGGTTTAAATAGAA---------ATAGGTCGATTTTG------TTGGAAAATCCAGGTTATAACAAT---------------AAATTTAGTTTCCTAATTGTGAAACG------------TTTAATTACTCGAATGTATC------AACAGAATCATTTTATTATTT---CTACTAATGATTCTAAC------AAAAATCCATTTTTGGGGTGCAACAAGA------GTTTGTATTCTCAAATGATATCAGAGGGATTTGCATTTATTGTGGAAATTCCGTTTTCT…
	Physalis_virginiana	ATGGAAGAAATCCAAAGATATTTACAGCCAGATAGCTCG---CAACAACACA------ATTTCCTATATCCACTTATCTTTCAGGAGTATATTTATGCACTTGCTCATGATCATGG---------AA---------ATAGGTCGATTTTG------TTGGAAAATCCAGGTTATAACAAT---------------AAATTTAGTTTCCTAATTGTGAAACG------------TTTAATTACTCGAATGTATC------AACAGAATCATTTTATTATTT---CTACTAATGATTCTAAC------AAAAATCCATTTTTGGGGTGCAACAAGA------GTTTGTATTCTCAAATGATATCAGAGGGATTTGCATTCATTGTGGAAATTCCGTTTTCT…
	Plantago_patagonica	ATGGAGGAAATCCAAAGAGATTTACAGTTAGACAGATCT---CGACAGCAGG------ACTTTCTATATCCACTTATTTTTCAGGAGTATATTTATGCATTTGCCCACGATCGTAGTTT------GA---------GTCGATCCTTTTTG------TCTGAAAATCAGGATTCGGAAAATCAGGTTTATGAAAATAAATCCAGTTTACTGATTGTGAAACG------------GTTAATTACTCAAATGTATA------AACAGAACCATTTTCTTATTT---CTACAAATGATTCGAAG------CAAAATGCATTGTTGGGCTGCAACAAGG------ATTTGTATTCTCAAATCCTATCAGAGGGTTTTACATTTATTGTGGAAATTCCATATTCT…
	Ratibida_columnifera	ATGGAGAAATTCCAAAGCTATTTAGGGCTAGATAGATCT---------CACT------ACTTCTTATATCCACTTATCTTTCAGGAGTATATTTATGTACTTGCTCATGATCATGGTTT------AA---------ATGGATCTATTTTG------TTGGAAAATGCAGGTTATGACAAT---------------AAATCCAGTTTACTAATTGTGAAACG------------TTTAATCATTCGAATGTATC------AACAGAATCATTTGATTCTTT---CTGTTAATGATTCTAAA------CAGACTCCATTTTTGGGGCACAACAAGA------ATTTTTATTCGCAAGTAATGTCAGAGGTTTCTTCAACCATTATGGAAATTCCATTGTCT…
	Rudbeckia_hirta_var_pulcherrima	ATGGAGAAATTCCAAAGCTATTTAGGGCTAGATAGATCT---------CACT------ACTTCTTATATCCACTTATCTTTCAGGAGTATATTTATGTACTTGCTCATGATCATGGTTT------AA---------ATGGATCTATTTTG------TTGGAAAATGCAGGTTATGACAAT---------------AAATCCAGTTTACTAATTGTGAAACG------------TTTAATCATTCGAATGTATC------AACAGAATCATTTGATTCTTT---CTGTTAATGATTCTAAA------CAGACTCCATTTTTGGGGCACAACAAGA------ATTTTTATTCGCAAGTAATGTCAGAGGTTTCTTCAACCATTATTGAAATTCCATTGTCT…
	Salvia_nemorosa	ATGGAGAAAATCCAAAGATATTTACAGCTAAAGAGATCT---CAACAACACG------ACTTCCTATACCCACTTCTATTTCAGGAGTATATTTATGTGTTTGCTCATAATCGTGCTTT------GA---------ATAGATCTATTTTG------TCGGAAAATCCGGGTTATGACAAT---------------AAATCCAGTTTACGGATTGTGAAACG------------GTTAATTACTCGAATGTATC------ACNAGAATCATTTTATTATTT---CTTCTAATGATTCTAAC------AAAAATCCATTTTTGGCGCGAAACAATA------ATTTGTATTCTCAAATTATATCAGAGGGGTTTGCTTTTATTGTCGAAATTCCATTTTTT…
	Senecio_integerrimus	ATGGATAAATCCCAAATCTATTTAGGGCTAGATAGATCT---CAACAACACT------ACTTCTTATATCCACTTATCTTTCAGGAGTATATTTATGTACTTGCTCATGATCATGGTTT------AA---------ATAGATCTATTTTG------TTGGAAAATGCAGGTTATGACAAT---------------AAATGCAGCTTACTAATTGTGAAACG------------TTTAATCATTCGAATGTATC------AACAGAA---------CCTTT---TTGTTAATGATTCTAAA------CAGACTCCATTTGTGGGGCACAACAAAA------ATTTTTATTCGCAAGTAATGTCAGAGGTTTCTTCAATCATTATGGAAATTCCATTGTCT…
	Silene_antirrhina	ATGGAAGAATTCCAAGGATATATAGAACTAGAAGGTTCT---TGGCAACACA------ACTTTTTCTATACACTTATCTTTCAGGAATATATTTTTTCGTTTGCATATGGTCATTATTT------AA---------ATAAATCTAATTTG------TTGGAAACTTCAGGTAATAGG------------------AAATATAGTTTACTAATTGTGAAACG------------TTTAATTACTCGAATGTATC------AACAGAATCATTTGATTCTTT---CGTCTAACGATTCTAAC------CAAAATGACTTTTGGGGGCACAAACGCA------ATTTTTATTCGCAAATGATATCAGAAGGATTTTCAGTCATTGTGGAAATTCCATTTTAT…
	Silene_vulgaris	ATGGAAGAATTCCAAGGATATATAGAACTAGAGGGTTCT---TGGCAACACA------ACTTTTTTTATCCACTTATCTTTCAGGAATATATTTTTTCGTTTGCATATGGTCATGATTT------AA---------ATAAATCTATTTTG------TTGGAAACTTCAGGTAATAGG------------------AAATATAGTTTACTAATTGCGAAACG------------TTTAATTACTCGAATGTATC------AACATAATCATTTGATTCTTT---CGTCTAACGATTCTAAC------CAAAATGACTTTTGGGGGCACAAACGCA------ATTTTTATTCGCAAATGATATCAGAAGGATTTTCAGTTATTGTGGAAATTCCATTTTAT…
	Silphium_integrifolum	ATGGAGAAATTCCAAAGCTATTTAGGGCTAGATAGATCT---------CACT------ACTTCTTATATCCACTTATCTTTCAGGAGTATATTTATGTACTTGCTCATGATCATGGTTT------AA---------ATGGATCGATTTTG------TTGGAAAATGCAGGTTATGACAAT---------------AAATCCAGTTTACTAATTGTGAAACG------------TTTAATCATTCGAATGTATC------AACAGAATCATTTGATTCTTT---CTGTTAATGATTCTAAA------CATACTCCATTTTTGGGGCACAACAAGA------ATTTTTATTCGCAAGTAATGTCAGAGGTTTCTTCAACCATTATGGAAATTCCATTGTCT…
	Solanum_carolinense	ATGGAAGAAATCCACAGATATTTACAGCCAGATAGCTCA---CAACCACACA------ACTTCCTATATCCACTTATCTTTCAGGAGTATATTTATGCACTTGCTCAGGATCATGGTTTAAATAGAA---------ATAGGTCGATTTTG------TTGGAAAATTCAGGTTATAACAAT---------------AAATTTAGTTTCCTAATTGTGAAACG------------TTTAATTACTCGAATGTATC------AACAGAATCATTTTCTTATTT---CTACTAATGATTCTAAC------AAAAATCCATTTTTGGGGTGCAACAAGA------GTTTGTATTCTCAAATGATATCAGAGGGATTTTCATGTATTGTGGAAATTCCGTTTTCT…
	Solanum_rostratum	ATGGAAGAAATCCACAGATATTTACAGCCAGATAGCTCA---CAACCACACA------ACTTCCTATATCCACTTATCTTTCAGGAGTATATTTATGCACTTGCTCAGGATCATGGTTTAAATAGAA---------ATAGGTCGATTTTG------TTGGAAAATTCAGGTTATAACAAT---------------AAATTTAGTTTCCTAATTGTGAAACG------------TTTAATTACTCGAATGTATC------AACAGAATCATTTTCTTATTT---CTACTAATGATTCTAAC------AAAAATCCATTTTTGGGGTGCAACAAGA------GTTTGTATTCTCAAATGATATCAGAGGGATTTGCATGTATTGTGGAAATTCCGTTTTCT…
	Solanum_triflorum	ATGGAAGAAATCCACAGATATTTACAGCCAGATAGCTCG---CAACAACACA------ACTTCCTATATCCACTTATCTTTCAGGAGTATATTTATGCACTTGCTCAGGATCATGGTTTAAATAGAA---------ATAGGTCGGTTTTG------TTGGAAAATTCAGGTTATAACAAT---------------AAATTTAGTTTCCTAATTGTAAAACG------------TTTAATTACTCGAATGTATC------AACAGAATCATTTTCTTATTT---CTACTAATGATTCTAAC------CAAAATCCATTTTTGGAGTGCAACAAGA------GTTTGTATTCTCAAATGATATCAGAGGGATTTGCATGTATTGTGGAAATTCCGTTTTCT…
	Solidago_gigantea	ATGGATAAATTCCAAAGCTATTTAGGGCTAGATAGATCT---CAACAACACT------ACTTCTTATATCCACTTATCTTTCAGGAGTATATTTATGTACTTGCTCATGATCATGGTTT------AA---------ATAGATCAATTTTG------TTGGAAAATGCAGGTTATGACAAT---------------AAATCCAGCTTACTTATTGTAAAACG------------TTTAATCATTCGAATGTATG------AACAGAATCATTTGATTCTTT---CTGTTAATGACTCTAAA------CAGACTCCTTTTTTGGGGCAGACCAATC------ATTTTTATTCGCAAATAATGTCTGAGGTTTCTTCAATCATTATGGAAATTCCATTGTCT…
	Solidago_missouriensis	ATGGATAAATTCCAAAGCTATTTAGGGCTAGATAGATCT---CAACAACACT------ACTTCTTATATCCACTTATCTTTCAGGAGTATATTTATGTACTTGCTCATGATCATGGTTT------AA---------ATAGATCAATTTTG------TTGGAAAATGCAGGTTATGACAAT---------------AAATCCAGCTTACTTATTGTAAAACG------------TTTAATCATTCGAATGTATG------AACAGAATCATTTGATTCTTT---CTGTTAATGACTCTAAA------CAGACTCCTTTTTTGGGGCAGACCCATC------ATTTTTATTCGCAAATAATGTCTGAGGTTTCTTCAATCATTATGGAAATTCCATTGTCT…
	Symphoricarpus_occidentalis	ATGGAGGAATTCAAAAGAGATTTCGAGCTAGATGGGTCT---CAACAACACT------ACTTCTTATATCCACTTATCTTTCAGGAGTATATTTATGCACTTGCTCATGATCATGGTTT------AA---------ATAGAGCGCATTTG------TTGGAAAATGTAGGGTATGACAAT---------------AAATCTAGCTTACTATTTGTGAAGCG------------TTTAATTACTCAAATGTATC------AAAAGAATCATTTGATTTTTT---CTGTTAAGGATTCTAAC------CAAAATGTATTTTTGGGGCGCAATAAGA------ATTTGTATTCTCAAATGATATCAGAGGGATTTGCAGTCATTGTAGAAATTCCATTTTCT…
	Teucrium_canadense	ATGGAGGAAATCCAAAGATATTTACAGCTAGAGAAATCT---CAACAACACG------ACTTCTTATATCCACTTATCTTGCAGGAGTATATTTATGTATTTGCTCATAATTGTGCTTT------GA---------GTAGATCGATTTTT------TCTGAAAATCCGGGTTATGACAGT---------------AAATCAAGTTTACTGATTGTGAAACG------------ATTAATTACTCGAATGTATC------AACAGAATCATTTTCTTATTT---CTCCTAATGATTCTAAC------CAAAATCCATTTTGGGCGCGCAACAAGA------ATTTGTATTCTCAAATCATATCACACGGGTTTGCTTTTATTGTCGAAATTCCGTTTTCT…
	Thelesperma_filifolium	ATGGATAAATTCCAAAGCTATTTAGGGCTAGATAGATCT---------CACT------ACTTCTTATATCCACTTATCTTTCAGGAGTATATTTATGTACTTGCTCATGATCATGGTTT------AA---------ATGGATCGATTTTG------TTGGAAAATACAGGTTATGACAAT---------------AAATCCAGTTTACTAATTGTGAAACG------------TTTAATCATTCGAATGTATC------AACAGAATCATTTGATTCTTT---ATGTTAATGATTCTAAA------CAGACTCCATTTTTGGGGCACAACAAGG------GTTTTTATTCGCAAGTAATGTCAGAGGTTTCTCCAACCATTATGGAAATTCCATTGTCT…
	Tragopogon_dubius	ATGGAGAAATTCCAAAGCTATTTAGGGCTAGATAGATCT---CAACAACACT------ACTTCTTATATCCACTTATCTTTCAGGAGTATATTTATGTACTTGCTCATGATCATGGTTT------AA---------ATAGATCGATTTTG------TTGGAAAATGCAGGTTATGACAAT---------------AAATCCAGCTTACTAATTGTGAAACG------------TTTAATAACGCGAATGTATC------AACAGAATCATTTGATTCTTT---CTGTTAATGATTCTAAA------CGGACTCCATTTTTGGGTCACAACAAGA------ATTTTGATTCGCAAGTAATGTCAGAGGTATCTTCAATCATTATGGAAATTCCATTGTCT…
	Verbascum_thapsus	ATGGAGGAAATCCAAAGATATTTACAGCTAGAGAGATCTCAACAACAACACC------ACTTCCTATATCCACTTATCTTTCAGGAATATATTTATGTATTTGCTCATGATCGTGGTTT------CA---------GTAGATCGATTTTG------TCGGAAAATCGGGGTTATGACAAT---------------AAATCTAGTTTCCTGCTTGTGAAACG------------GTTAATTACTCGAATGTATC------AACAGAATCATTTTATTATTT---TTTCTAATGATTCTAAC------CAAAATCTATTTTGGGGGCGCAACAAGA------ATTTGTATTCTCAAATCCTATCAGAGGGGTTTTCTTTTATTTTGGAAATTCCATTTTCT…
	Verbena_hastata	ATGGAGGAAATCCAAAGATATTTACAACTAGAGAGATCT---GAACAACACG------ACTTCCTATATCCACTTATCTTTCAAGAGTATATTTATACATTTGCTCATGATCGTGGTTT------CA---------GTAGATCTATTTTG------TCGGAAAATCGGGGTTATGAAAAT---------------AAATCCAGTTTACTGATTGTGAAACG------------GTTAATTAATCGAATGGATC------AAGAGAACCGTTTTCTTATTT---CTCCTAATTATTCAAAC------CAAAATCCATTTTGGGCGTGCAACAAGA------ATTTCTATTCTCAAATTCTATCAGAGGGGTTTGCTTTTATTGTGGAAATTCCATTTTCT…
	Vernonia_baldwinii	ATGGAGAAATTCCAAAGTTATTTAGGGCTAGATAGATCT---CAACAACACT------ACTTCTTATATCCACTTATCTTTCAGGAGTATATTTATGTACTTGCTCATGATCATGGTTT------AA---------ATAGATCGATTTTG------TTGGAAAATGCAGGTTATGACAAT---------------AAATCCAGCTTACTAATTGTGAAACG------------TTTAATCATTCGAATGTATC------AACAGAATCATTTGATTCTTT---CTGTTAATGATTCTAAA------CAGACTCCATTTTTGGGGCACAACAATC------ATTTTTATTCGCAAGTAATCTCAGAGATATCTTCAATCATTATGGAAATTCCATTGTCT…
	Veronica_americana	ATGGAGGAAATCCAAAGATATTTACAGCTAGAGAGATCT---CAACAACACG------ACTTTCTATATCCACTTATCTTTCAGGAGTATATTTATGCATTTGCTCATGATCGTACTTT------CA---------GTAGATATATTTTG------TCGGAAAATAGGGATTCGGAAAATTCGGATTCTCAGAAAAAATATAGTTTACTGATTGTGAAACG------------GTTAATTACTCGAATGTATC------AACAGAATCATTTTTTAATTT---CTCCTAATGATTCTAAC------CAAAATCTATTTTGTGGTCGAAACAAGA------ATTTGTATTATCAAATCCTAGCAGAGGGGTTTGCGTTTATTGTGGAAATTCCATTTTCT…
	Xanthisma_spinulosum	ATGGATAAATTCCAAAGCTATTTAGGGCTAGATAGATCT---CAACAACACT------ACTTCTTATATCCACTTATCTTTCAGGAGTATATTTATGTACTTGCTCATGATCATGGTTT------AA---------ATAGATCAATTTTG------TTGGAAAATGCAGGTTATGACAAT---------------AAATCCAGCTTACTTATTGTGAAACG------------TTTAATCATTCGAATGTATG------AACAGAATCATTTGATTCTTT---CTGTTAATGACTCTAAA------CAGACTCCTTTTTTGGGGCAGACCAATC------ATTTTTATTCGCAAATAATGTCAGAGGTTTCTTCAATCATTATGGAAATTCCATTGTCT…
	Zizia_aurea	ATGGAAGAATTCCAAAGATATTTAAAGCTAAATAGATCT---CAACAACACT------ACTTCTTATATCCACTTATCTTTCAGGAGTATATTTATGCACTTGCGCATGATCATGGTTTAAATAGAA---------ATAGATCCGTTTTG------TTGGAAAATGCAGGTTCT---AAA---------------AAGTTCAGCTTACTAATTGTGAAACG------------TGCAATTGAGCGAATGTATCAATATGAACAGAATCATTTGATTCTTT---TTGCTAATGATTTTACC------CAAAATACCTTTTTTGGGCTCAACAAAA------ATTTTAATTTTCAAATGATATCAGAAGGATTTGCAGTCATTGTAGAAATTCCGTTTTAT…
;
end;
